# Supplementary material for: Fluctuations in AKT and PTEN Activity Are Linked by the E3 Ubiquitin Ligase cCBL
Source: MDPI journal article supplement (doi:10.3390/cells10112803), 2021-10-20

## Supplemental FigS1a

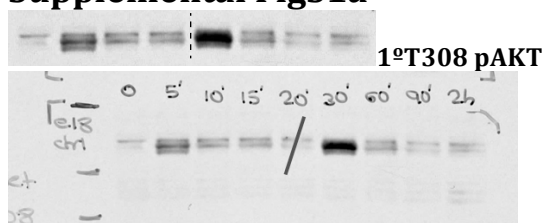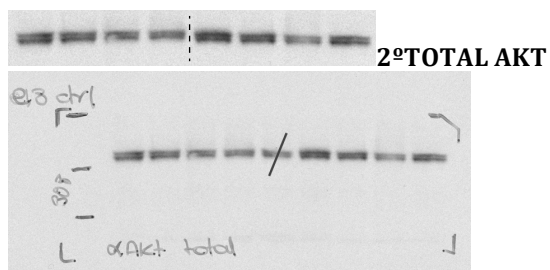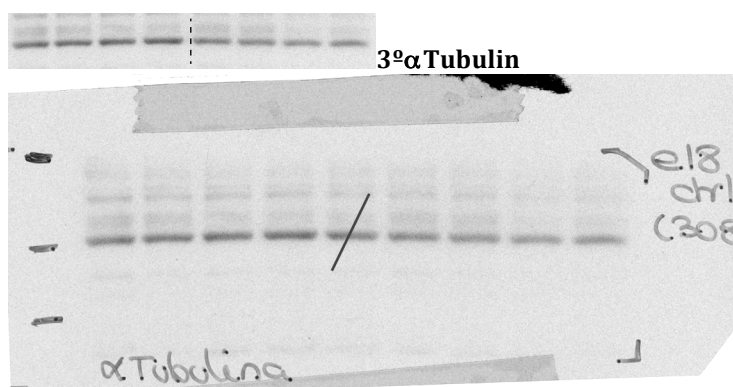

### 4°Ser 473 pAKT

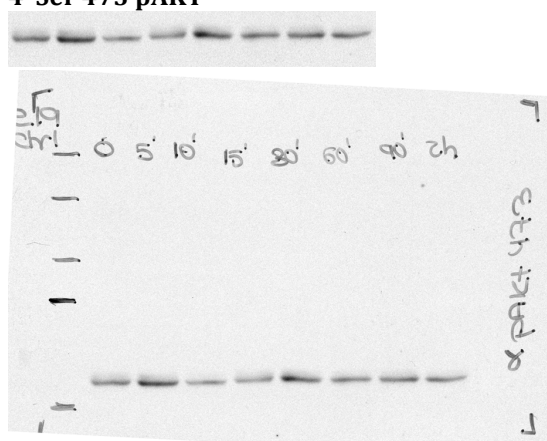

### 5°TOTAL Ser 473 pAKT

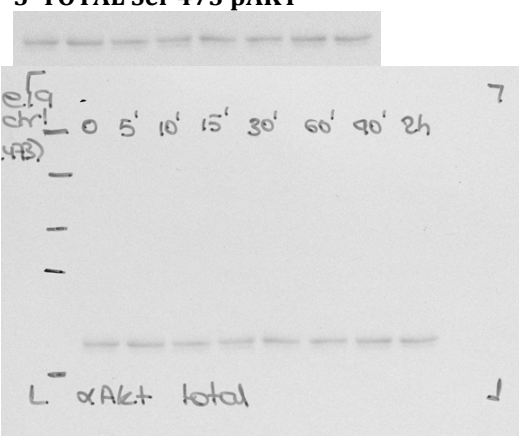

### 6°αTubulin

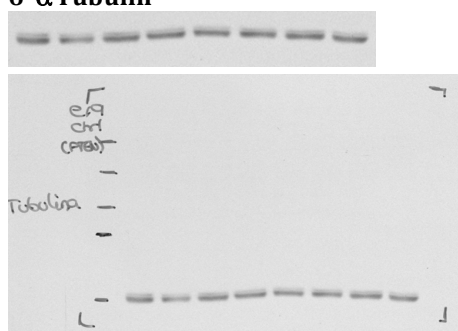

### 7°p110β p110beta was resolved in a different gel

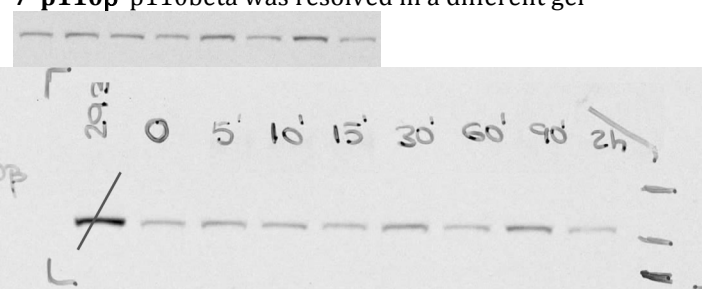



8°PTEN

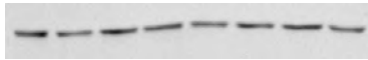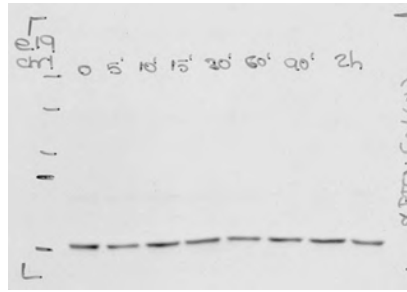

**FigS1a bottom**

1°p-EGFR

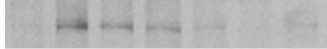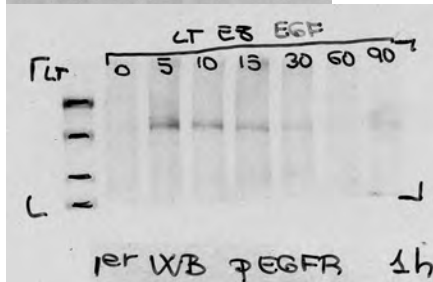

2° EGFR

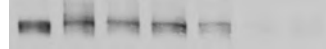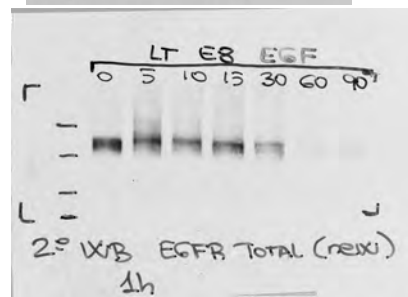

3°p-ERK

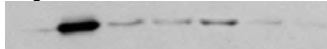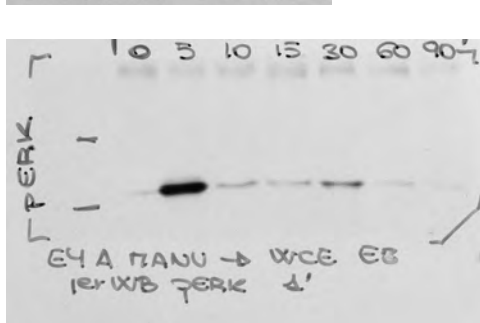

4° Total ERK

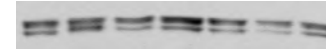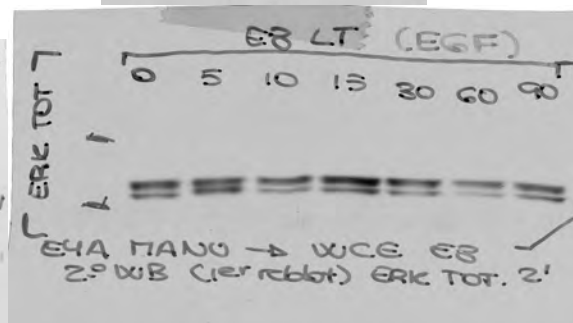

**FigS1b e1b kinetics EGF**

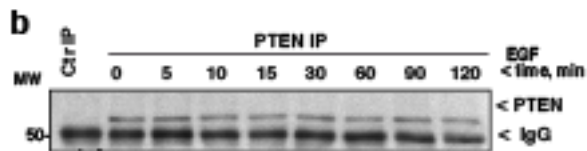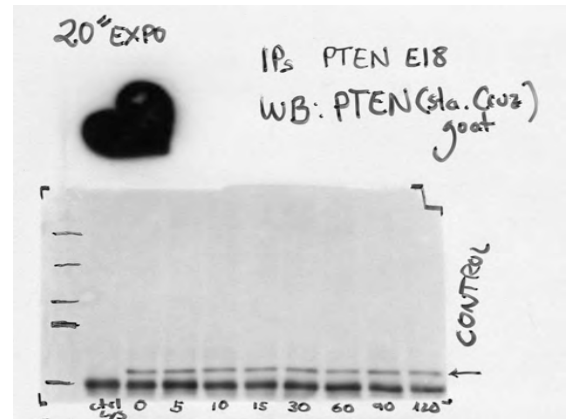

Supplemental FigS2

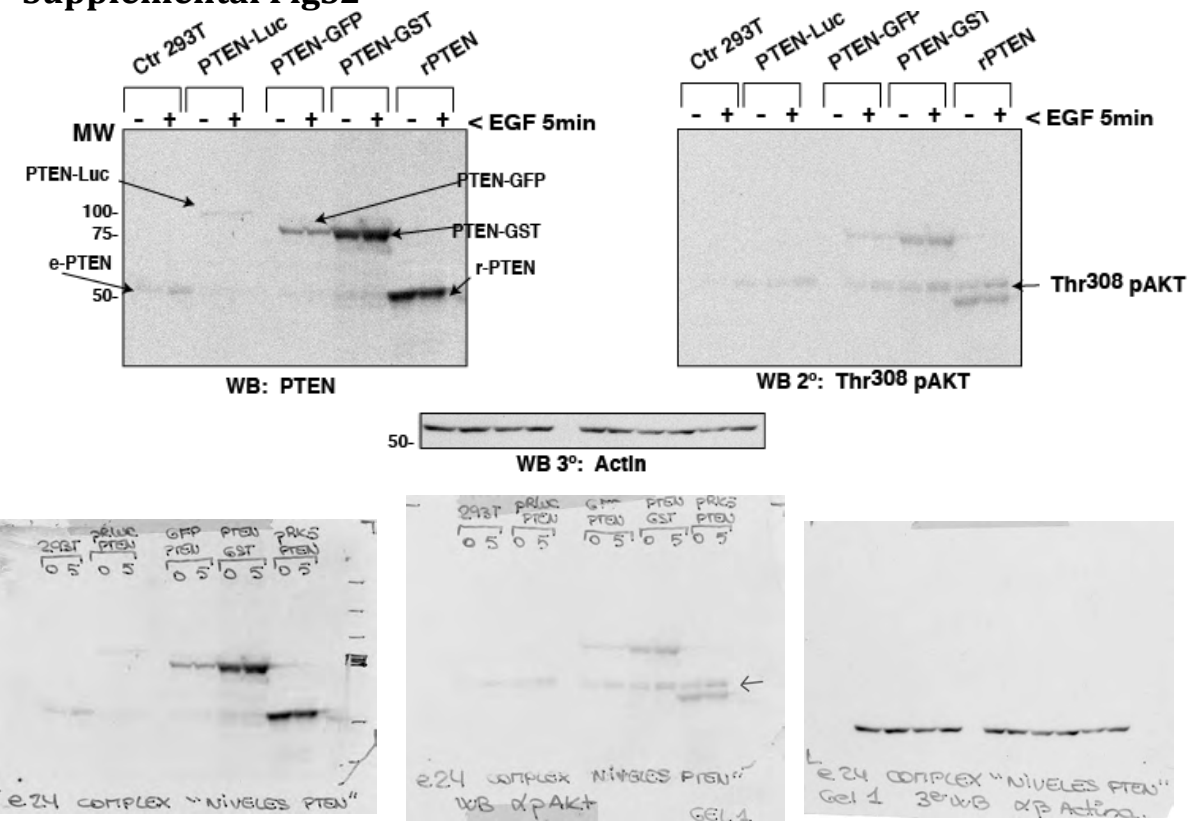

Supplemental FigS3

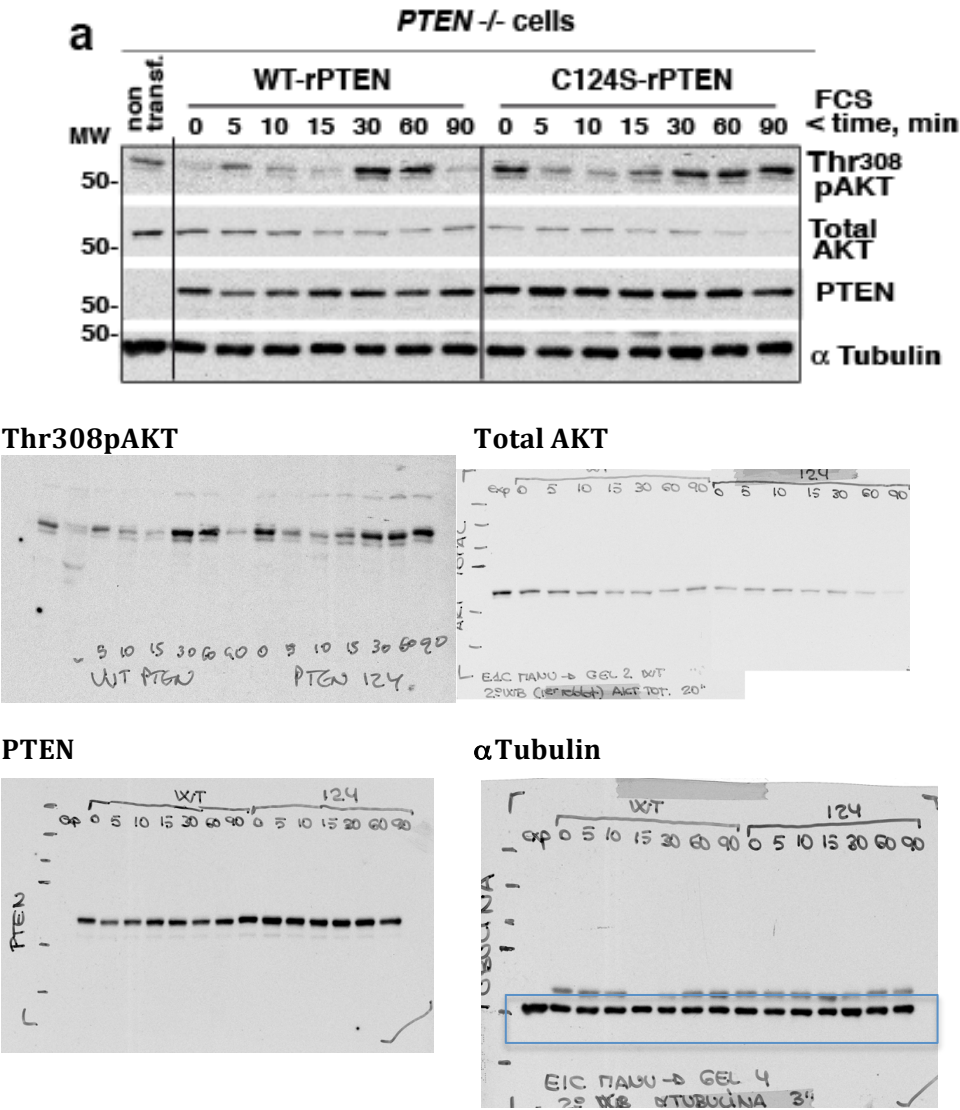

## Supplemental FigS4a

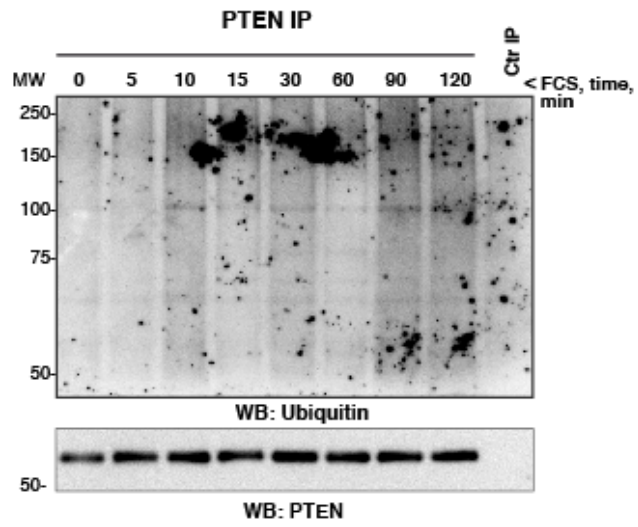

### Ubiquitin WB

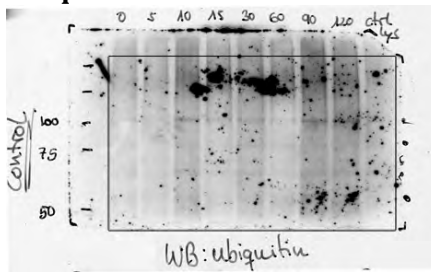

### PTEN WB

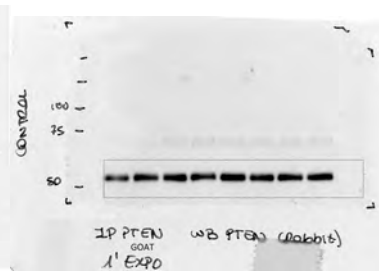

Supplemental FigS5a:

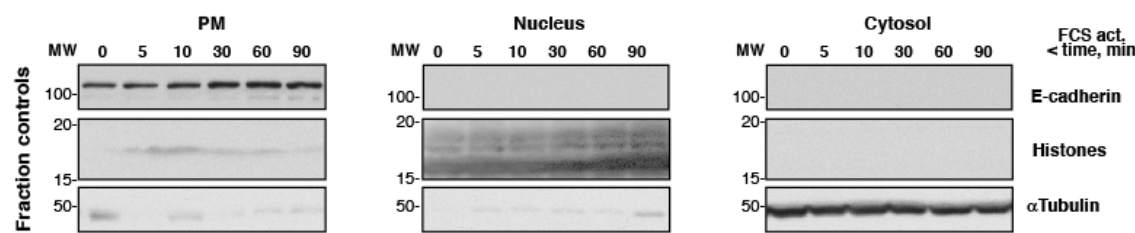

E-Cadherin

Histones

αTubulin

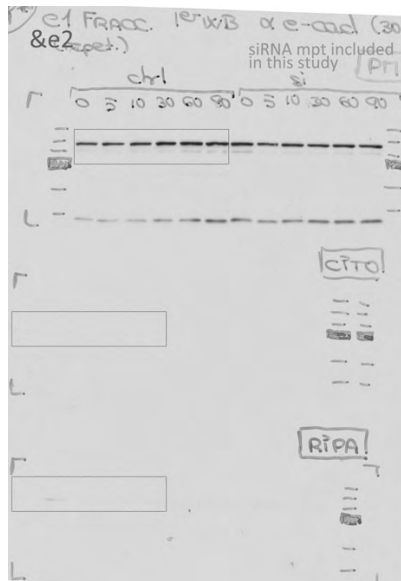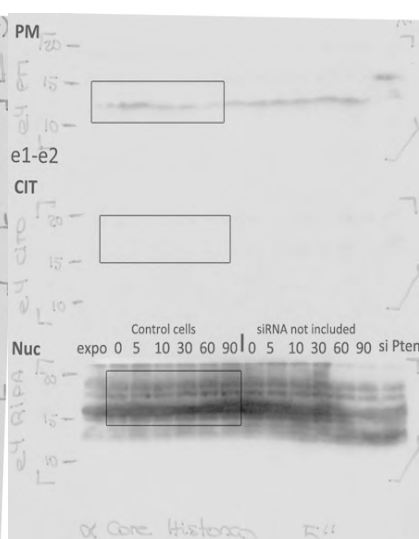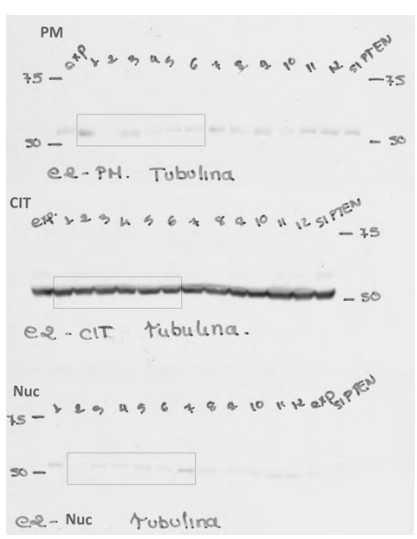

**Supplemental FigS5b:**

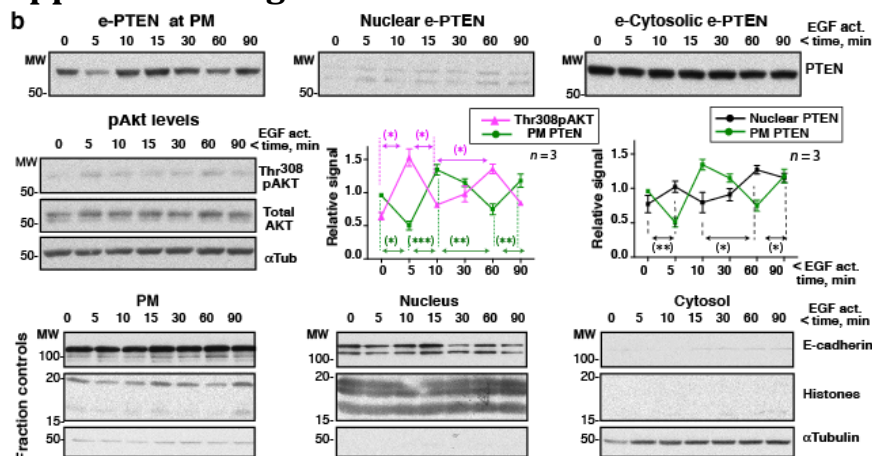

### PTEN in different fractions T308pAKT, Total AKT and Tubulin

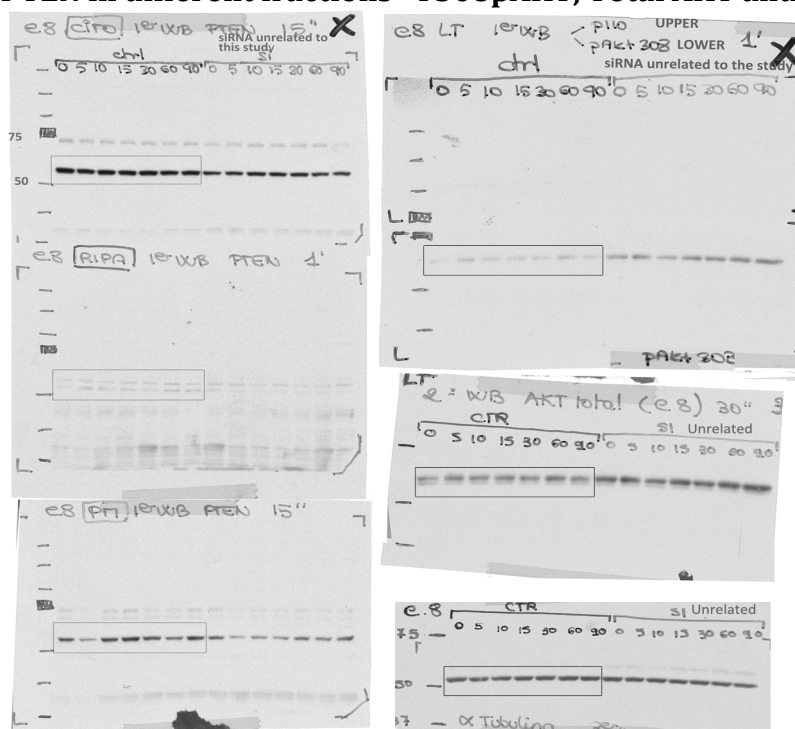

### E-Cadherin, Histones and Tubulin controls in different fractions

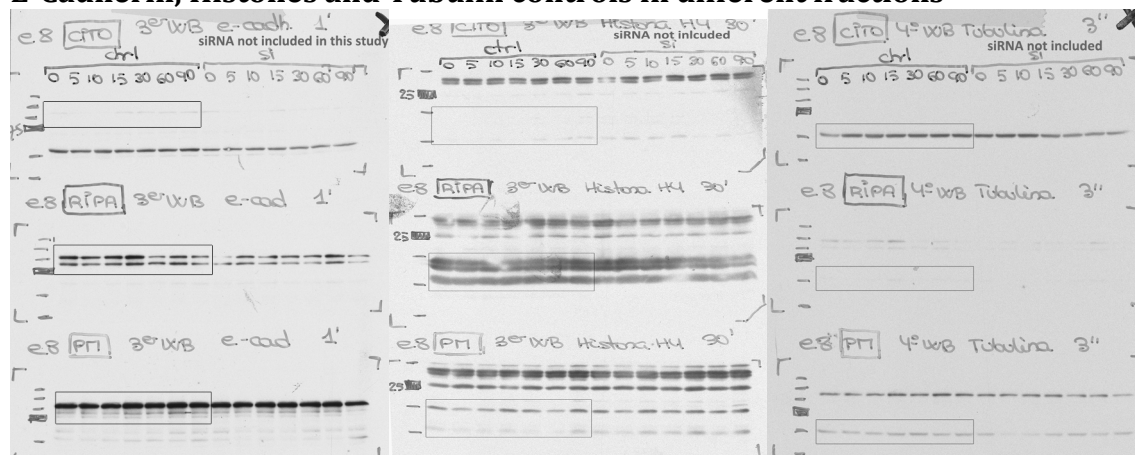



## Supplemental FigS5c:

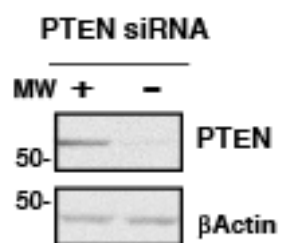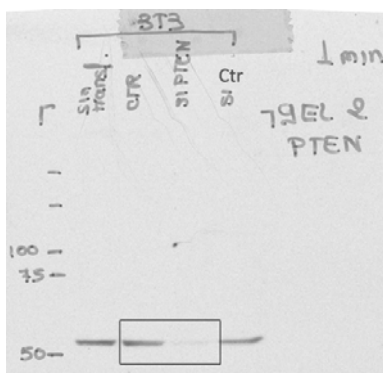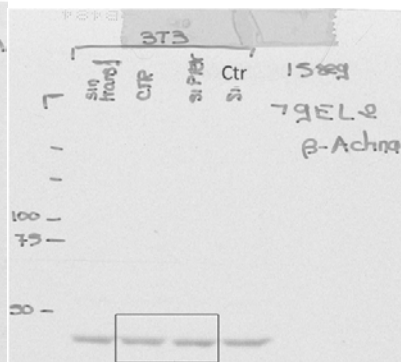

Supplemental Fig6Sa:

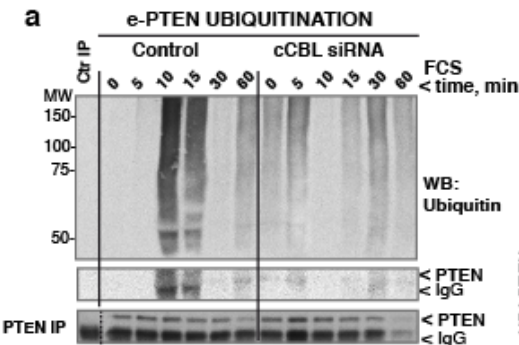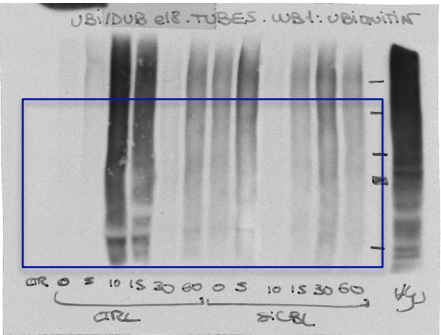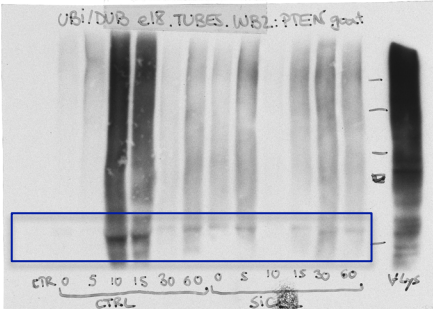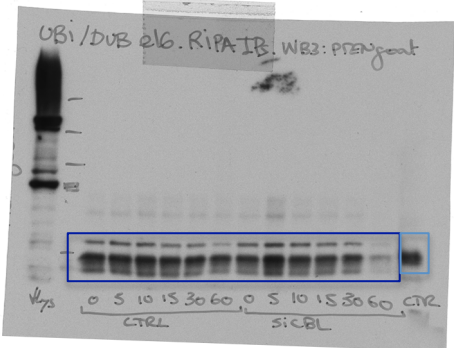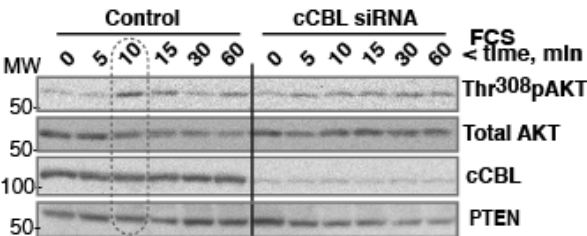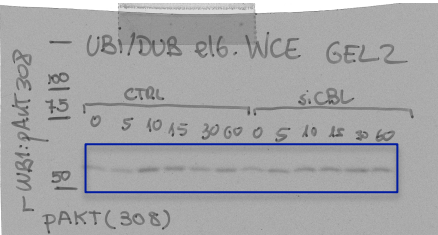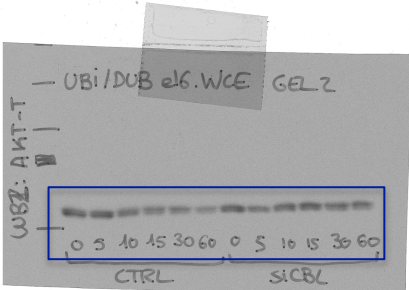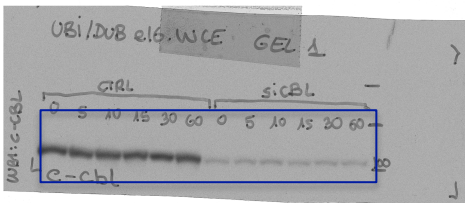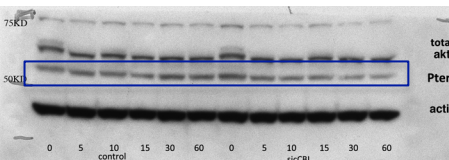

Supplemental Fig6b:

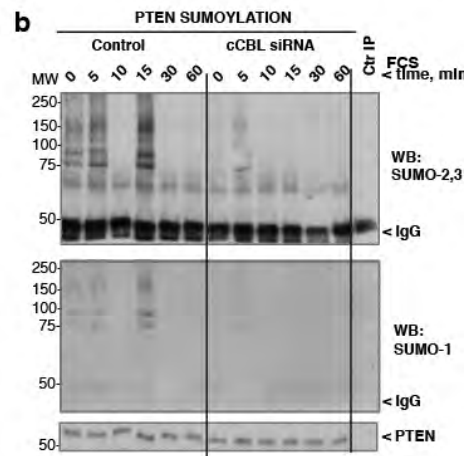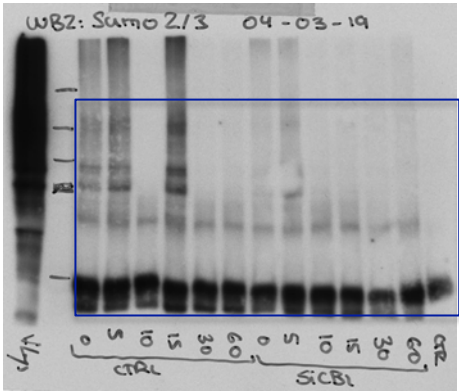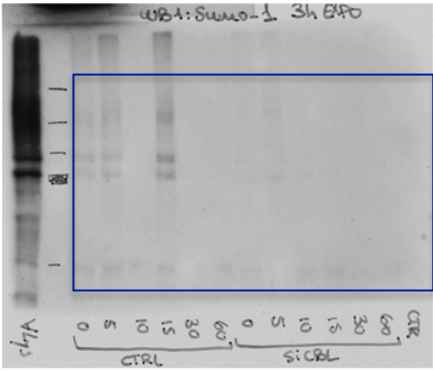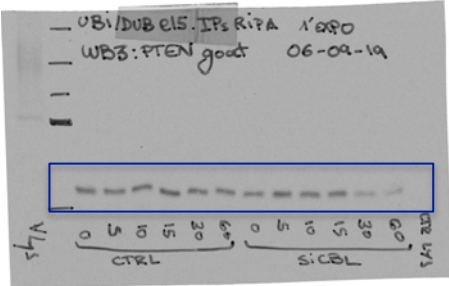

Supplemental Fig6c: in vitro ubi

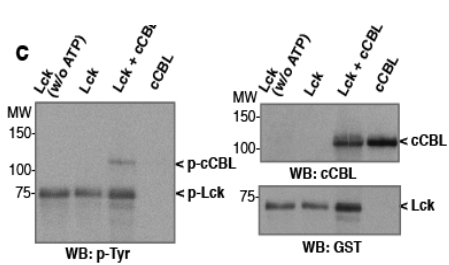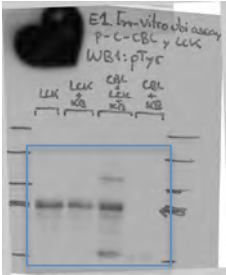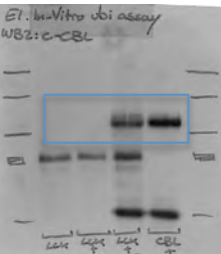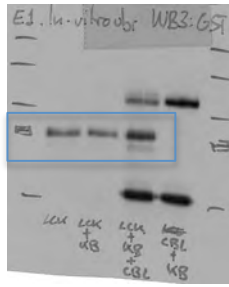

1° pTyr

2° cCBL

3° GST

**Supplemental Fig6d and e:**

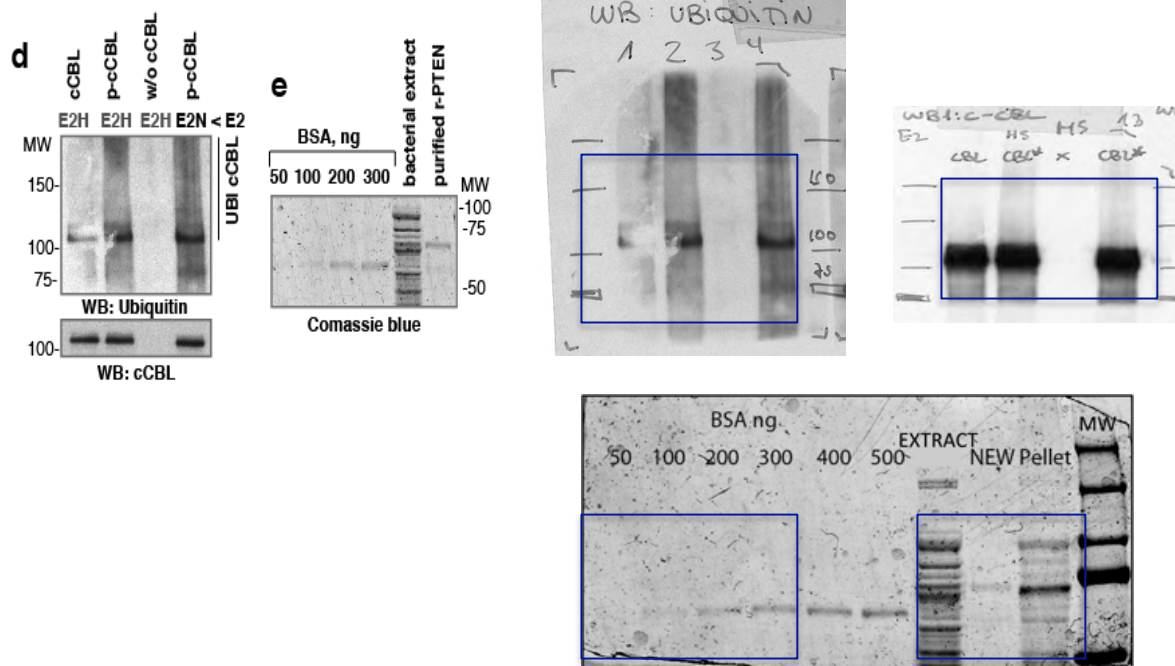

**Supplemental Fig6f:**

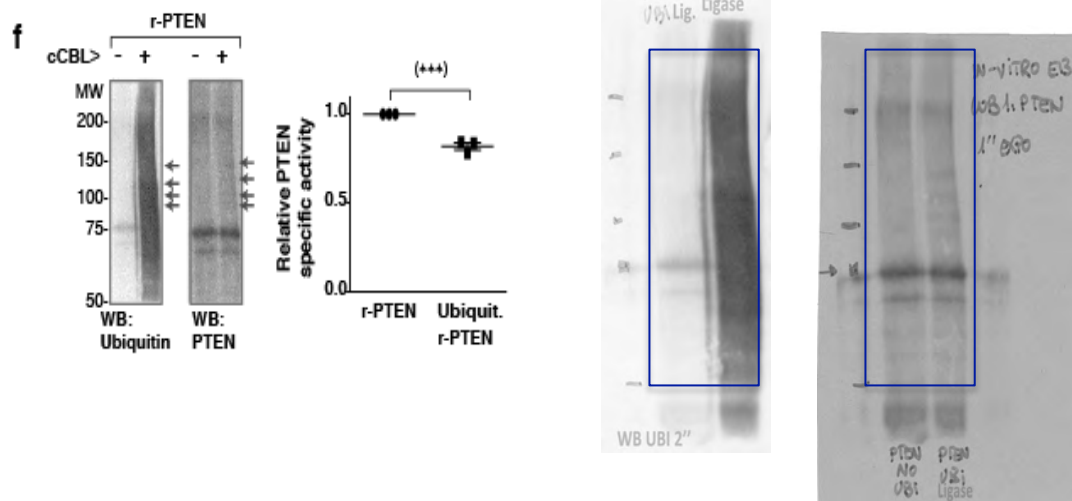

**Figura S7A NO WB**

**Figura S7b** WCE controls from e40 WCE and e47 WCE  
e40 1stWB p85alpha (TOP)      e40 2°WB cCBL (TOP)  
308pAKT (BOTTOM)      TOTAL AKT (BOTTOM)

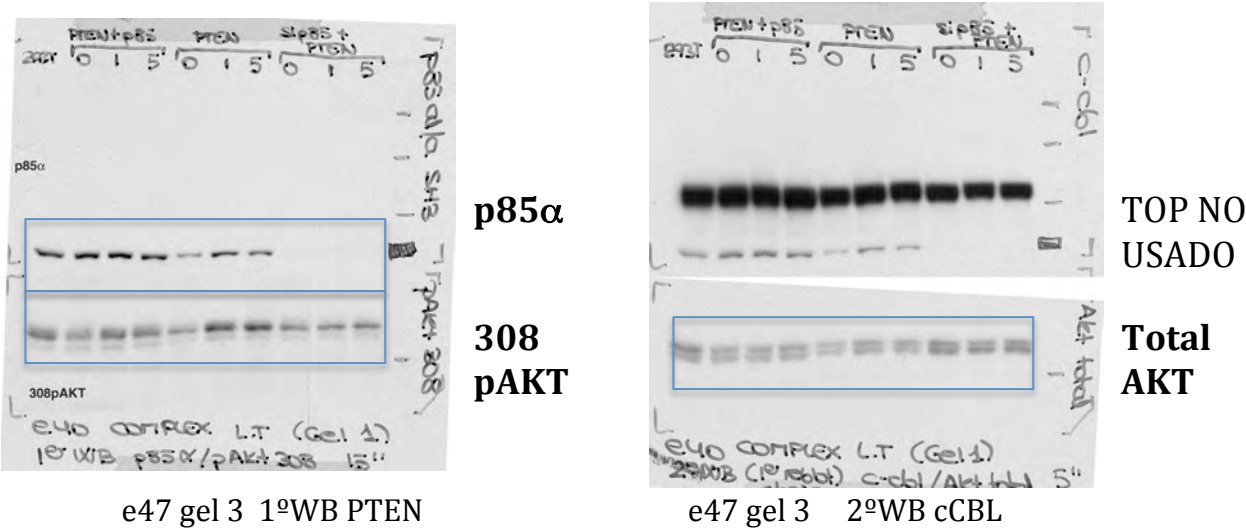

e47 gel 3 1°WB PTEN

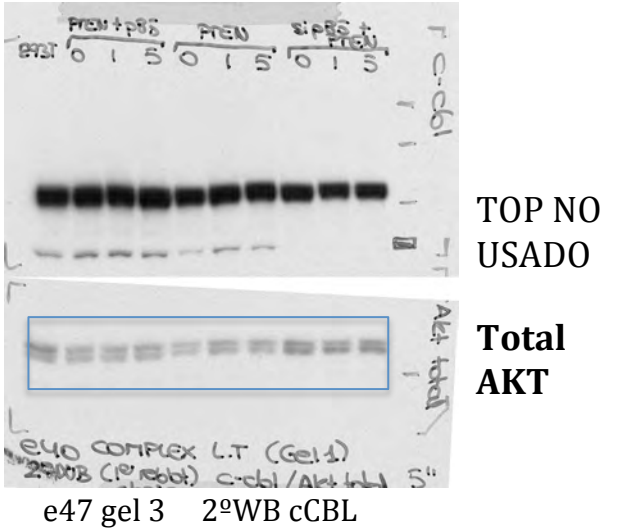

e47 gel 3 2°WB cCBL

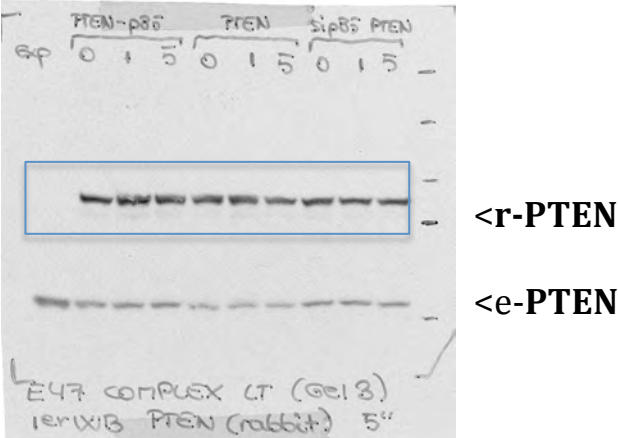

e47 gel 2 1°WB p85b

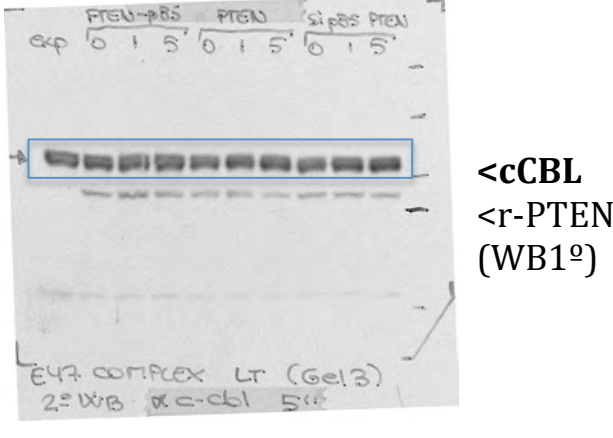

e47 gel 2 2°WB p110β

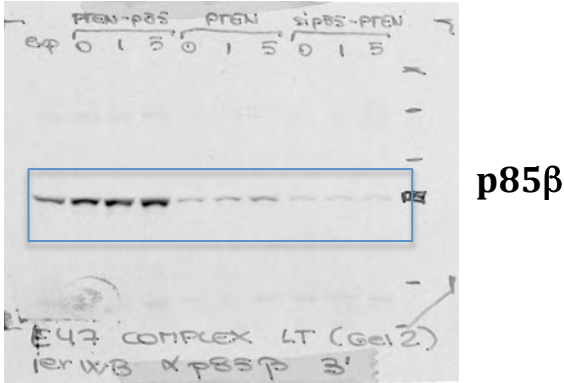

p85β

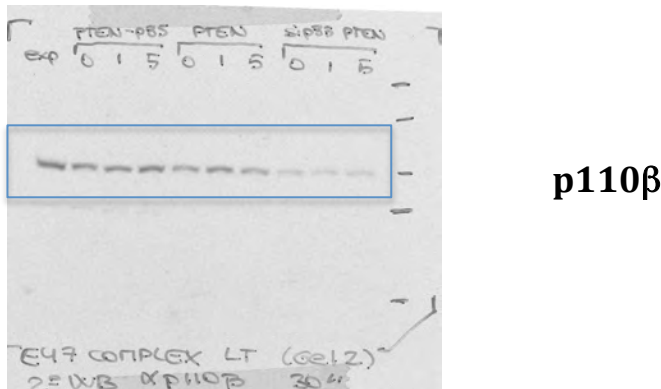

p110β

e47 gel 1 2°WB p110α(TOP)

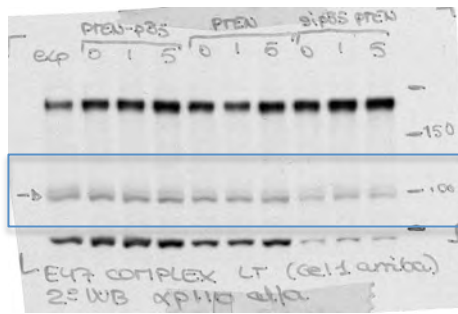

< non-specific band of  
p110α Ab

<p110α

<p85α  
(WB1°)

e47 gel 2 3°WB EGFR

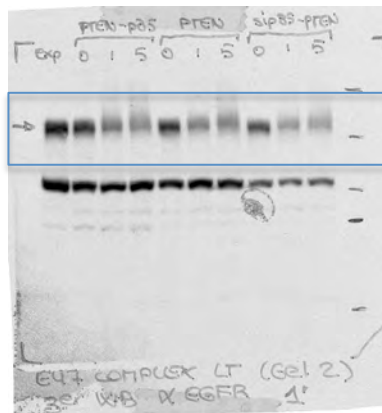

<EGFR

< p110β (2° WB)

e47 gel 3 3°WB (after reblot) αTubulin

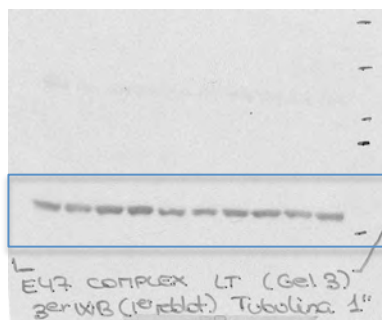

< αTubulin



**Figura S7c EGFR IP, WB PTEN**

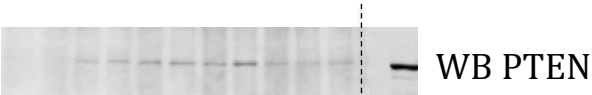

same blot less exposed (for right lane)

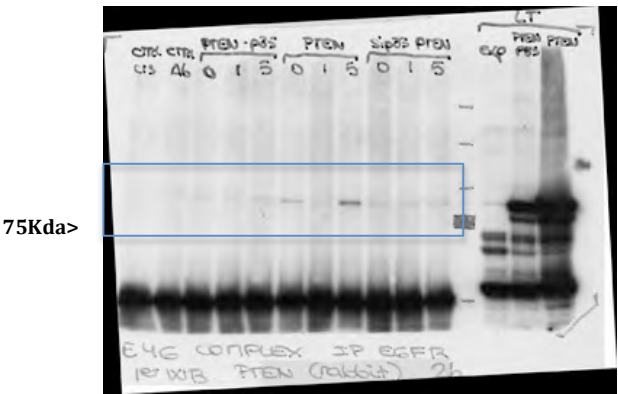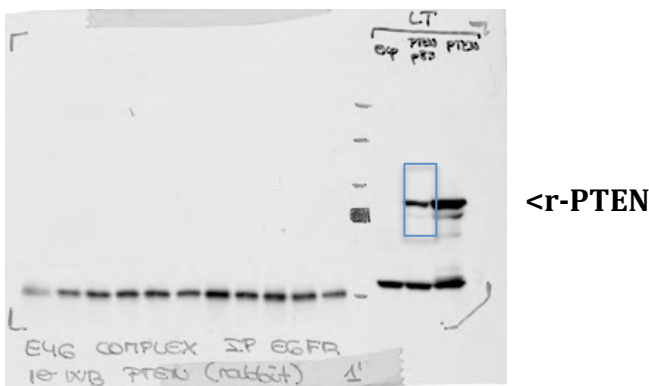

**Figura S7c cCBL IP, WB PTEN**

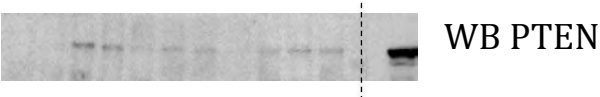

same blot less exposed (for last lane)

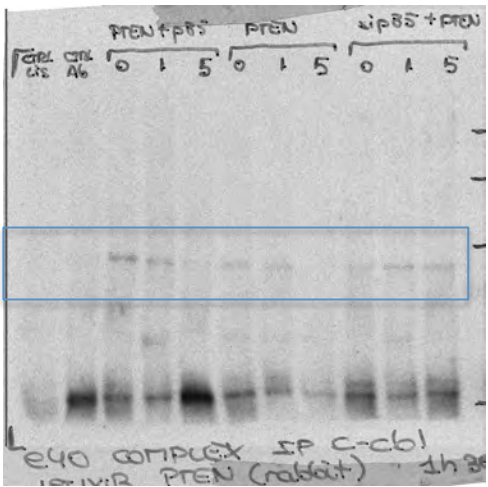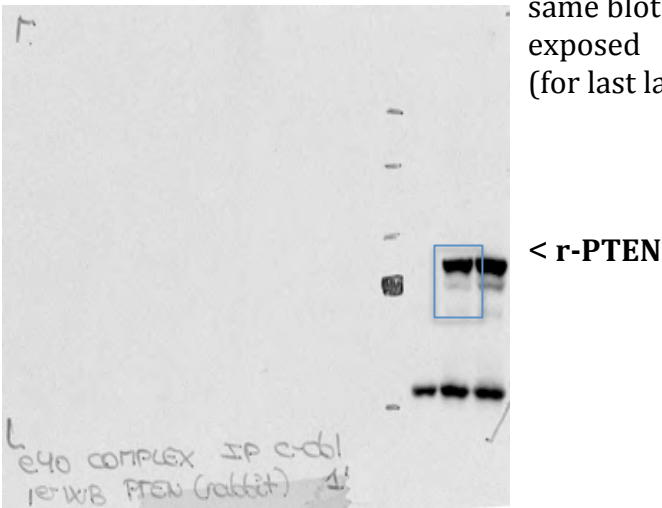

7°pTyr

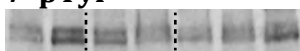

8°pEGFR

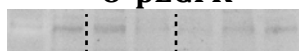

9° EGFR total

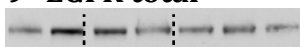

10° pERK

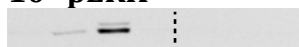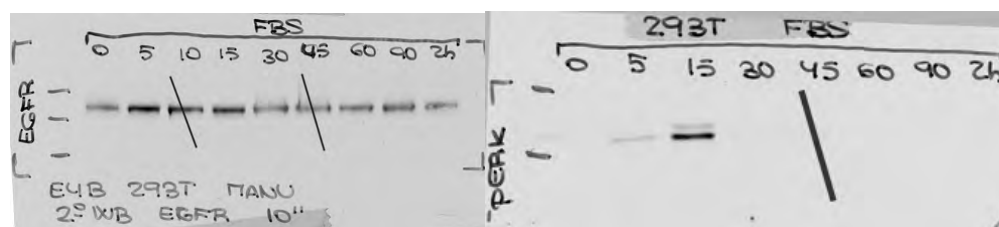

11° ERK total

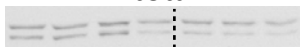

12° βActin

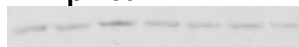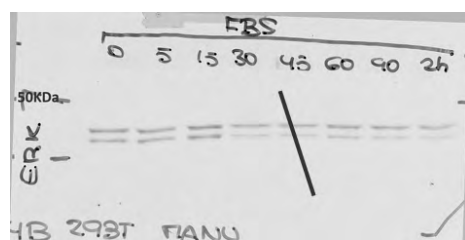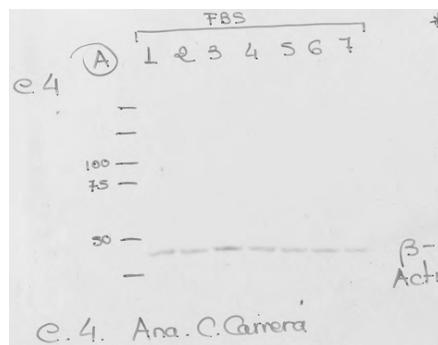

Fig1b: PTEN IP and WB

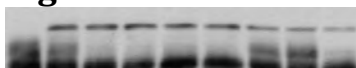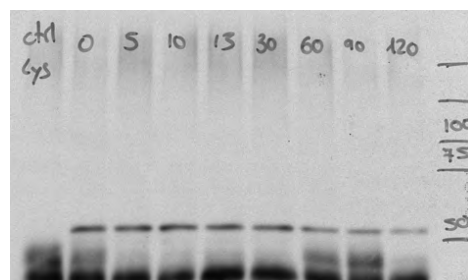

**Fig1d:**

**d**

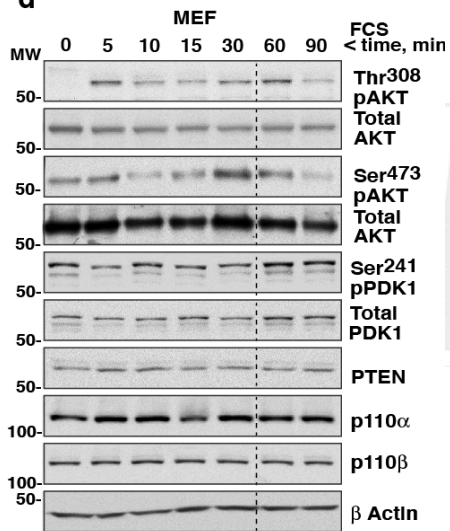

### 1ºT308 pAKT

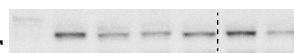

## 2ºTotal AKT

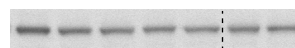

Total AKT

**3ºS473 pAKT**

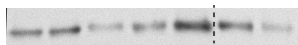

#### 4ºTotal pAKT

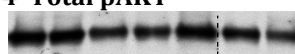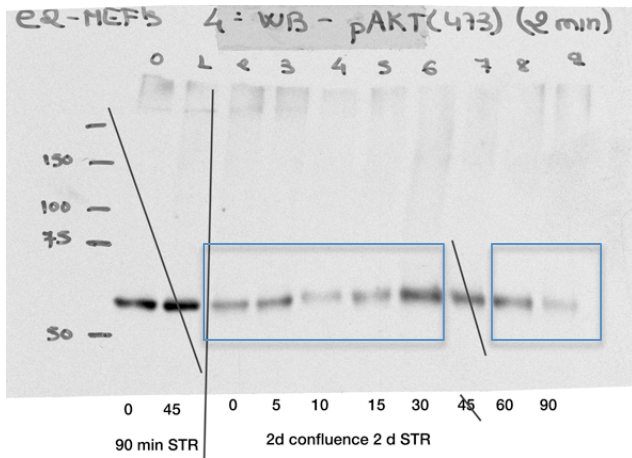

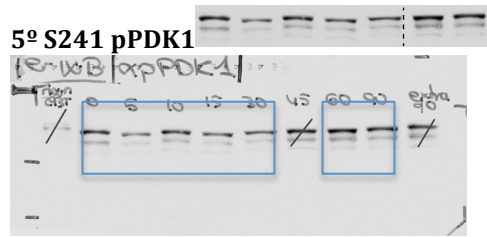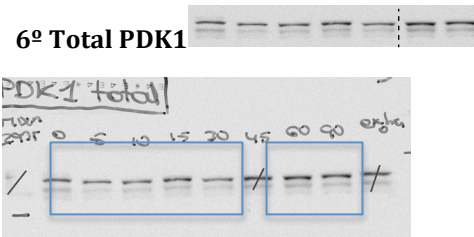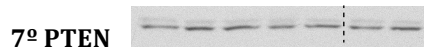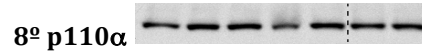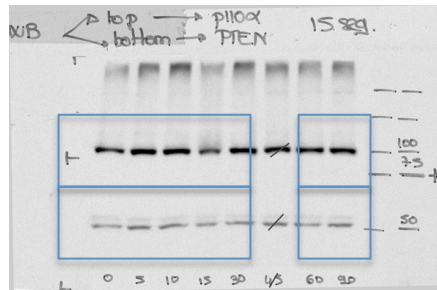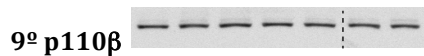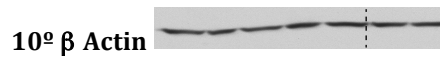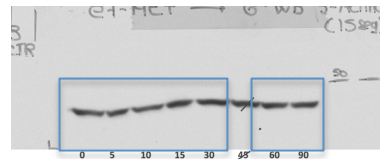

In these experiments several gels from the same samples had to be resolved to do all the presented blots.

Fig.3a:  
**a**

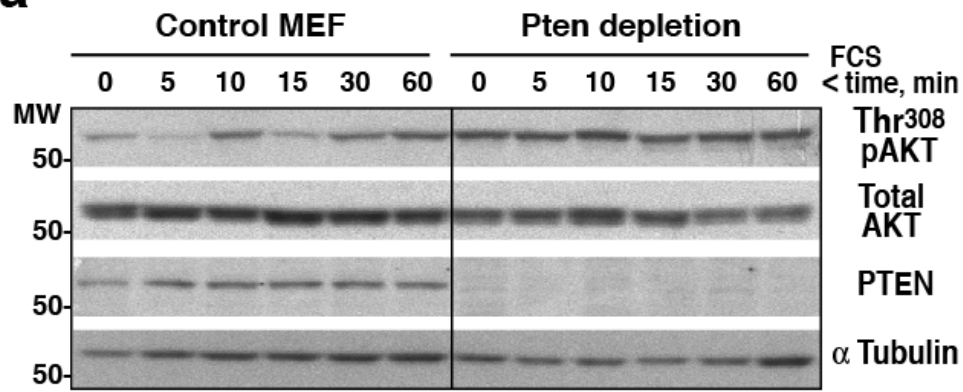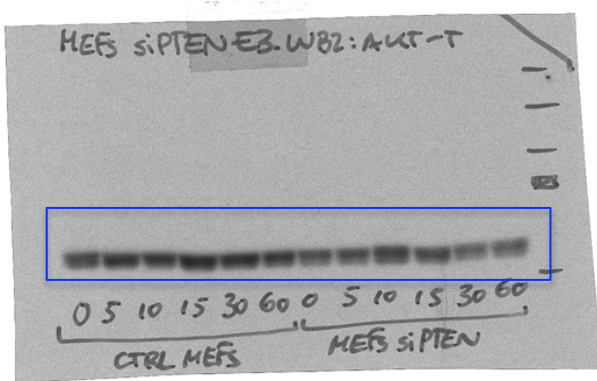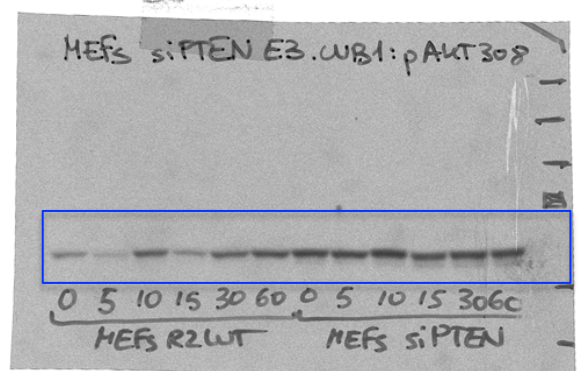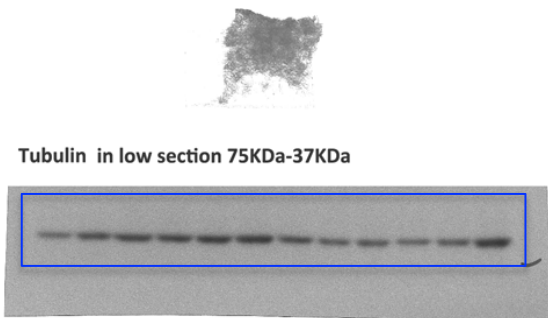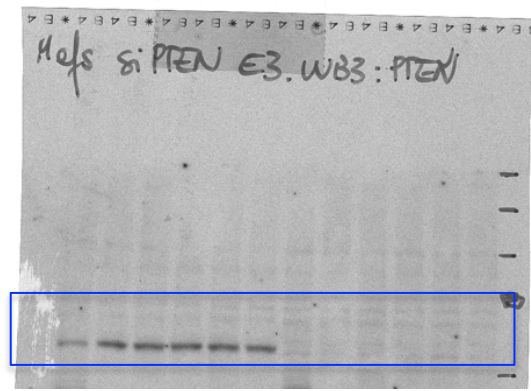



Fig.3b:

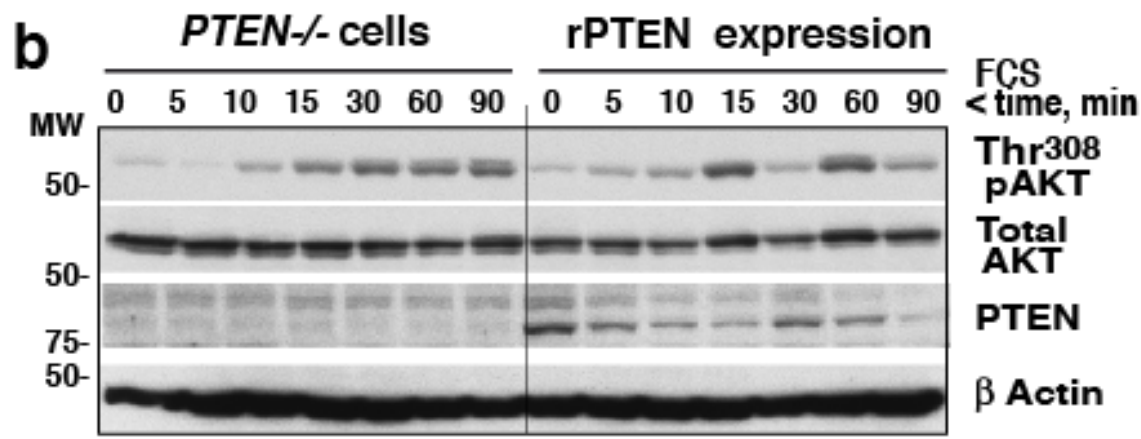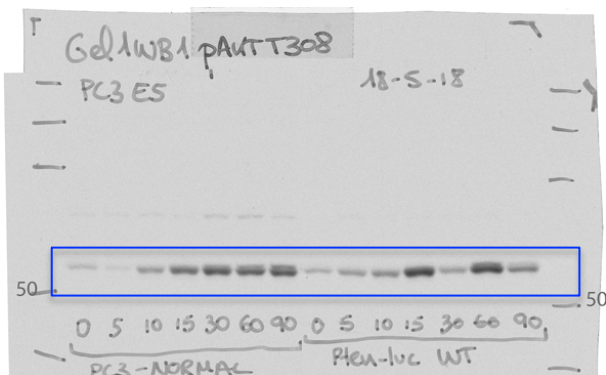

1° T308pAKT

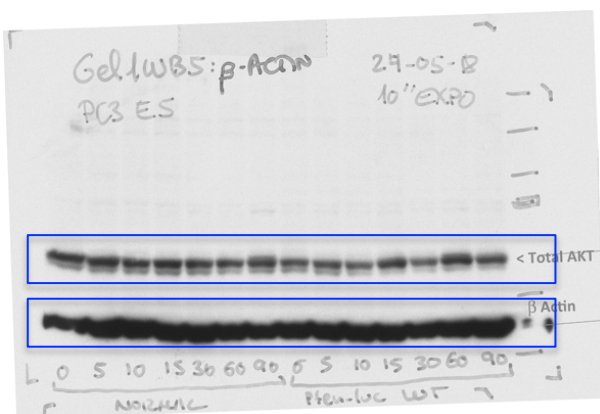

2° AKT

<<<<4°  $\beta$  Actin

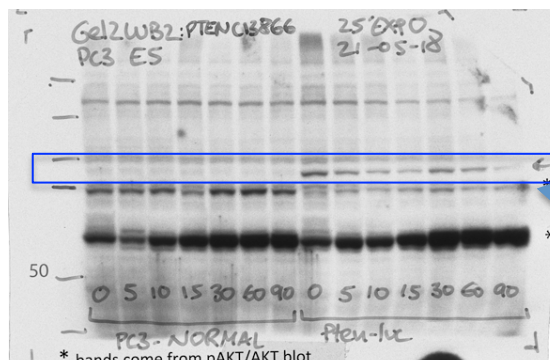

3° PTEN

from 2° WB Total AKT  
<<from 2° WB Total AKT



**Fig.3b bottom:**

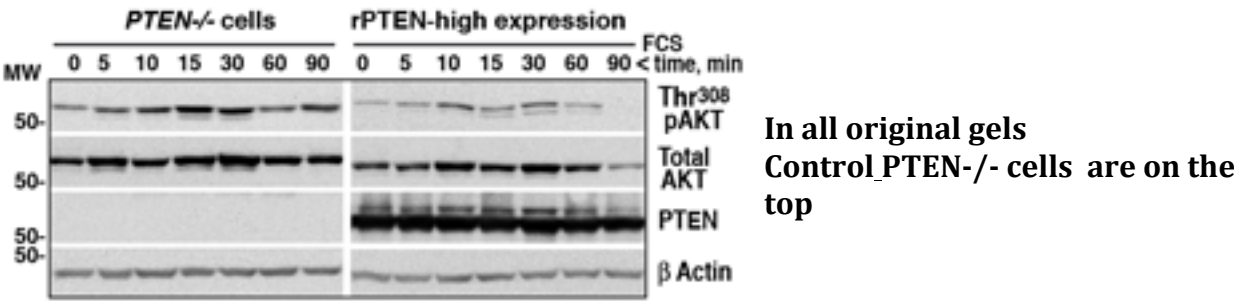

**WB T308 pAKT**

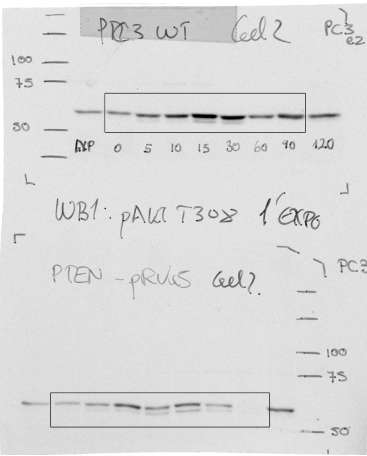

**WB Total AKT**

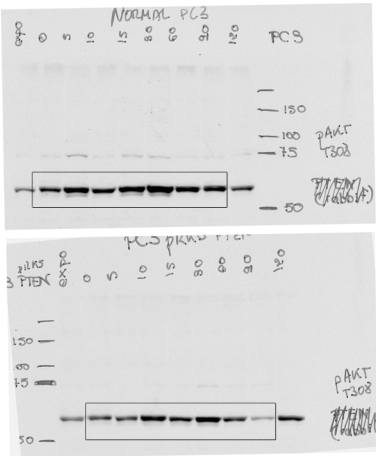

**WB PTEN**

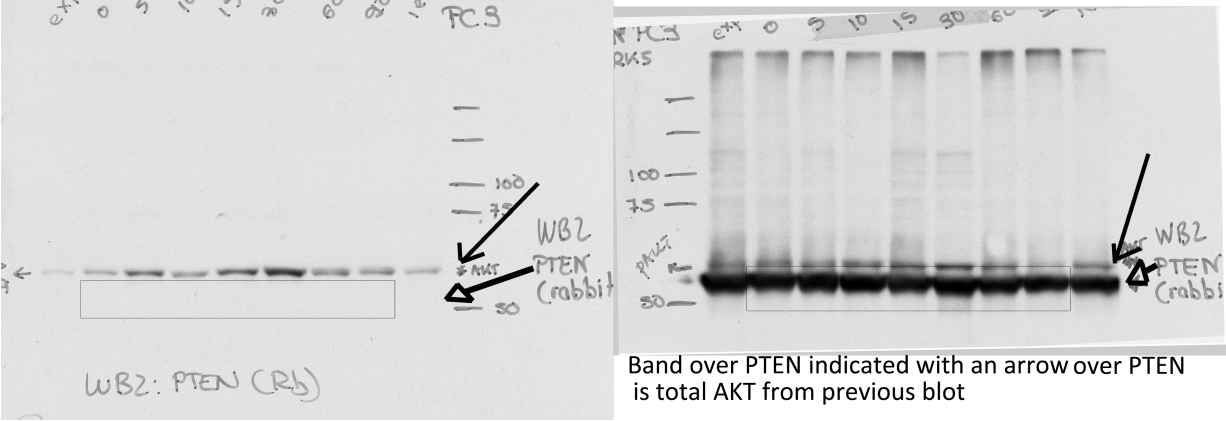

**WB ACTIN (samples resolved in a new gel)**

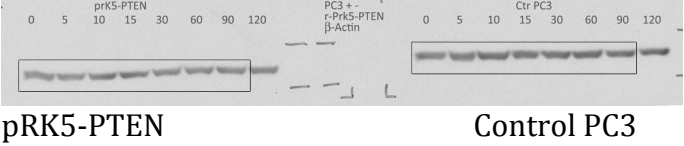

Fig. 4a:

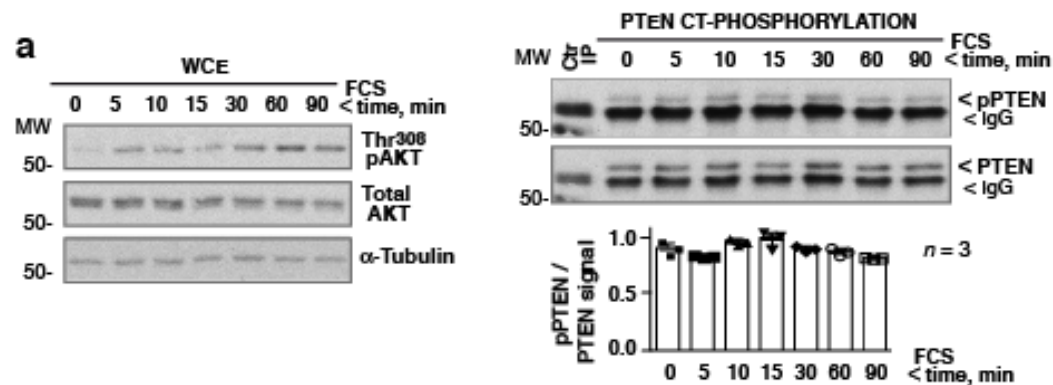

### T308 p-AKT

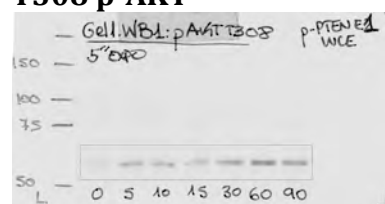

### Total AKT

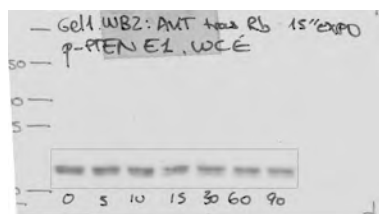

### $\alpha$ Tubulin

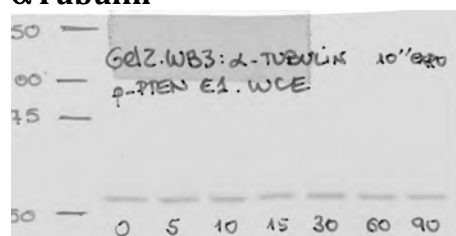

### IP PTEN, WB: phospho-PTEN

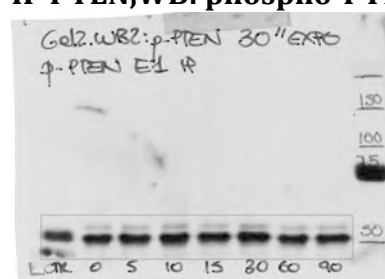

### IP PTEN, WB: PTEN

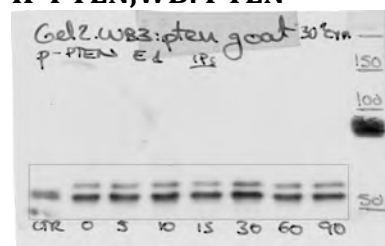

Fig. 4b:

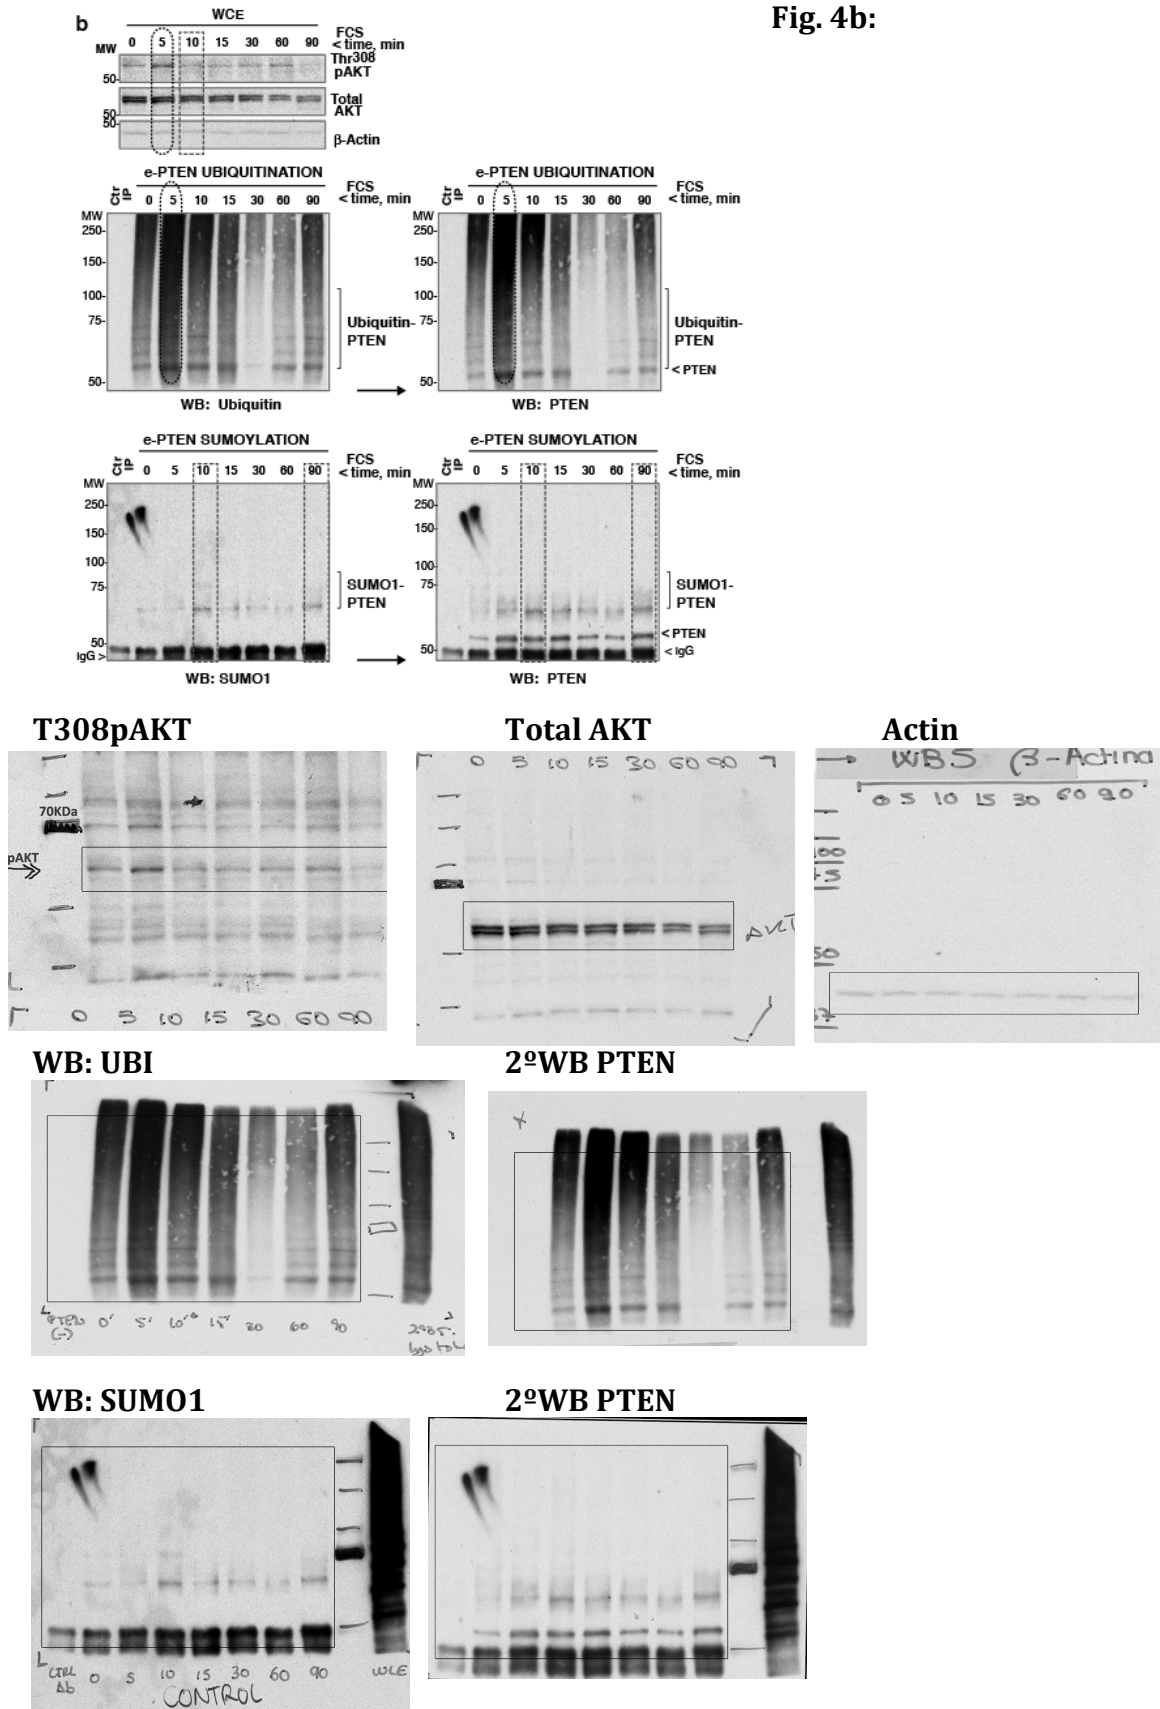

Fig5a:

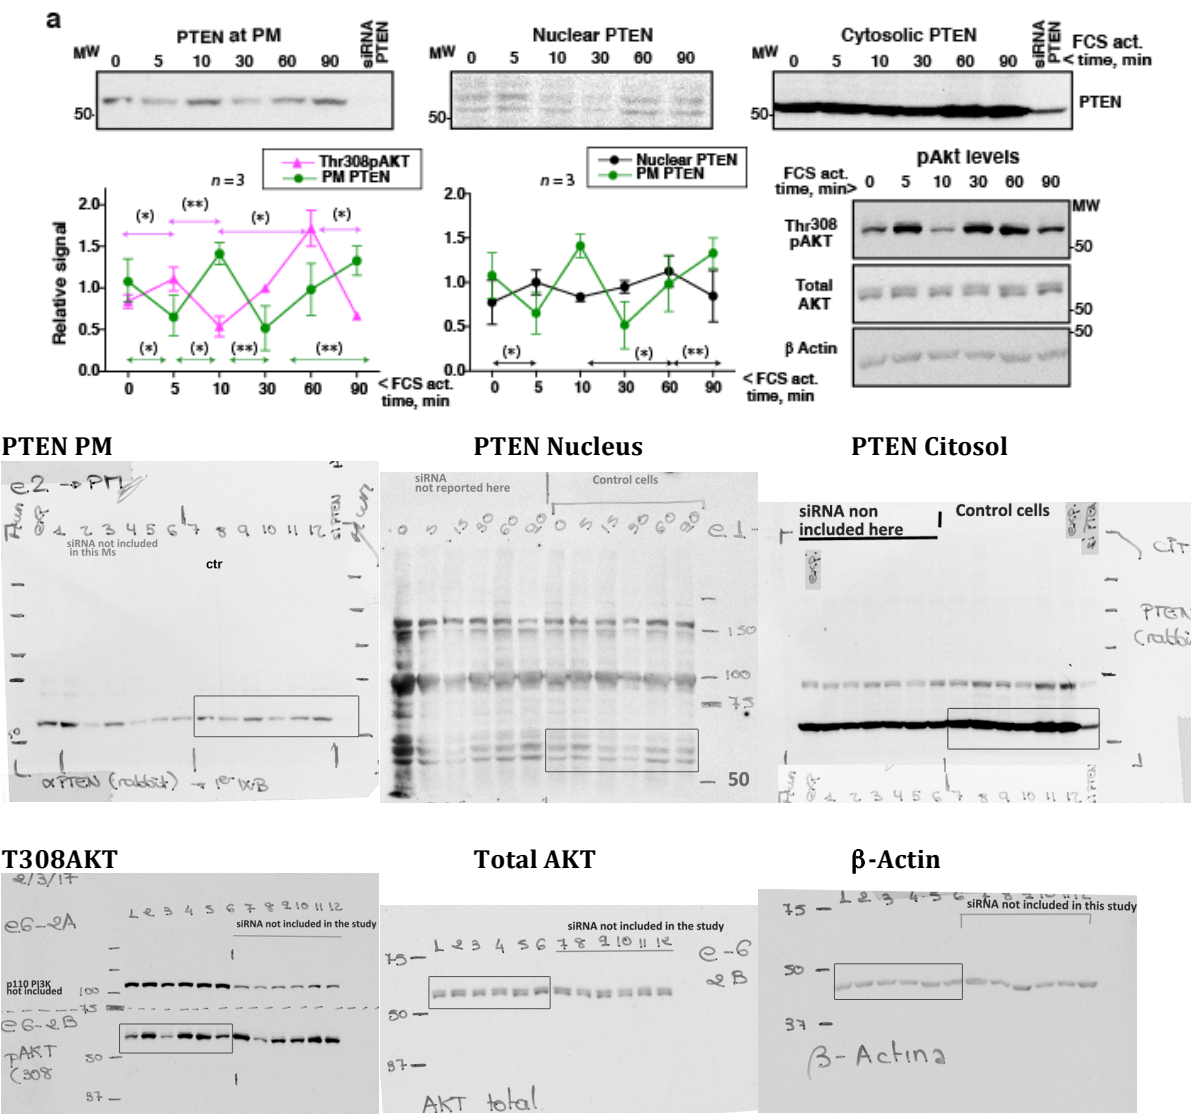

Fig5b:

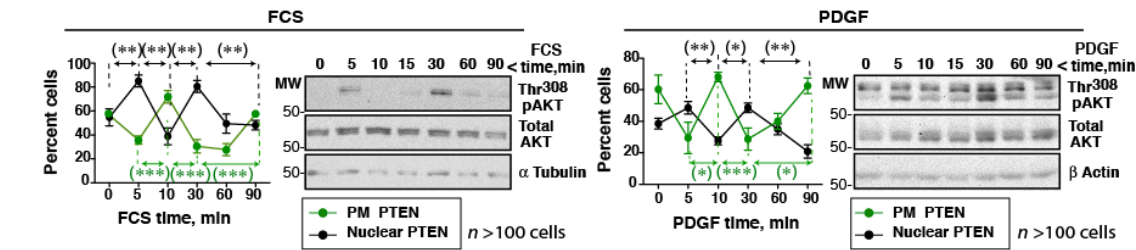

FCS T308AKT

Total AKT

α-Tubulin

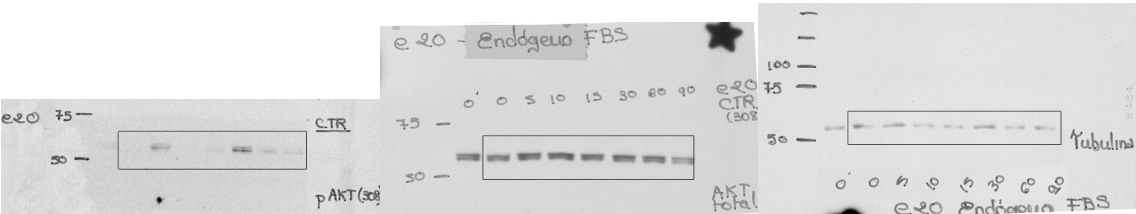

PDGF T308AKT

Total AKT

β-Actin

note that in these blots times go from right to left

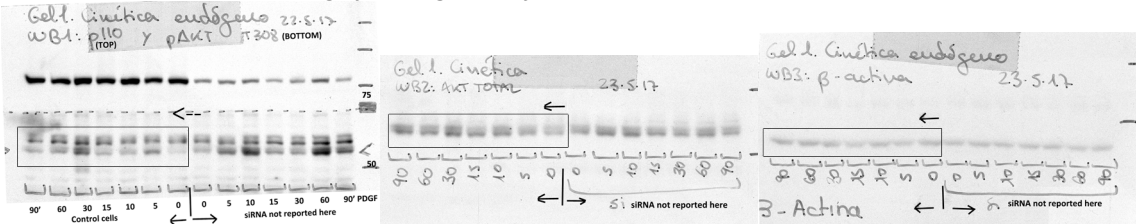



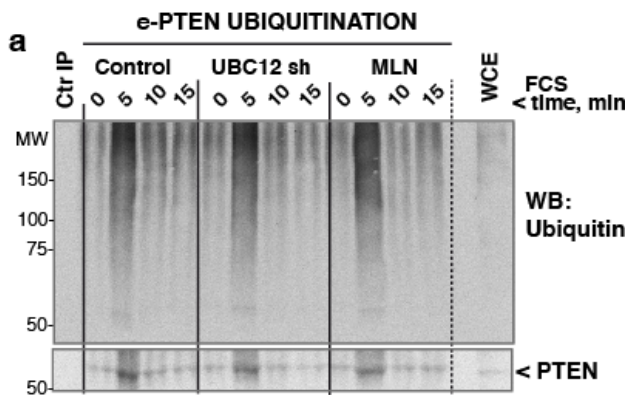

**Figure 6a**

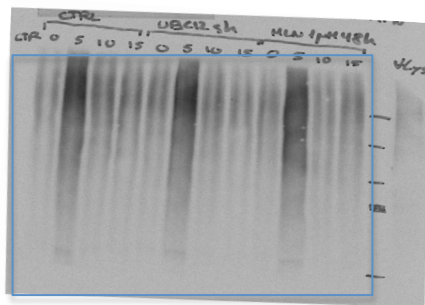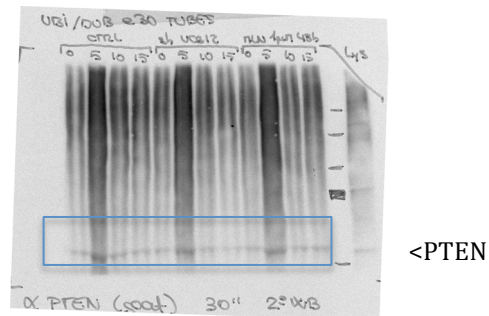

CONTROL MLN

p27

$\alpha$ Tubulin

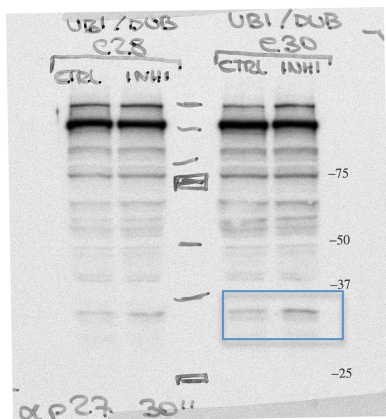

<p27

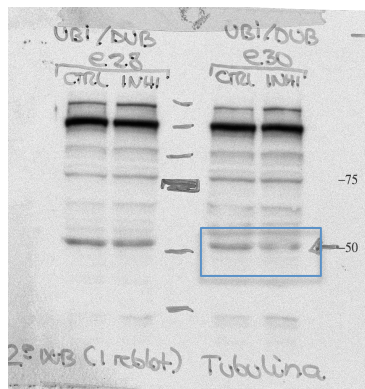

< $\alpha$ Tubulin

WCE WB

Thr308pAKT

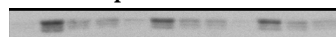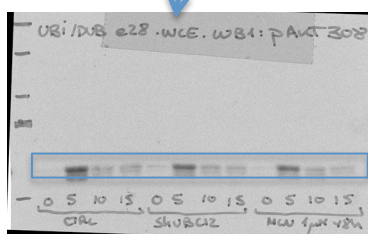

TOTAL AKT

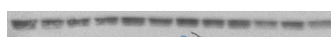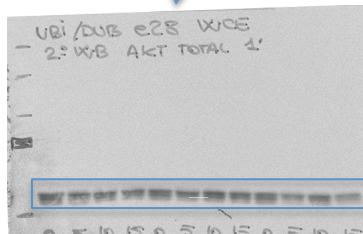

$\alpha$ Tubulin

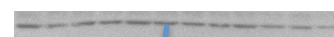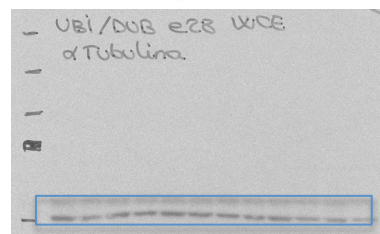



Figure 6b

PTEN IP, 1st WB Ubiquitin

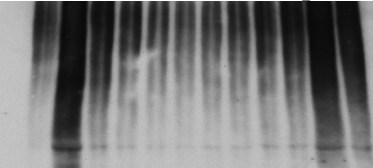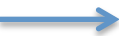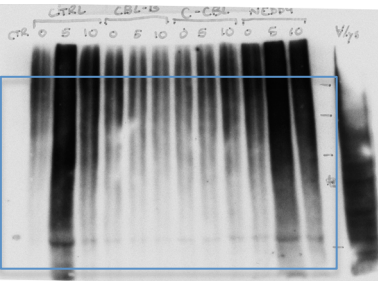

siRNA CONTROLS

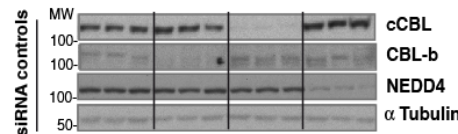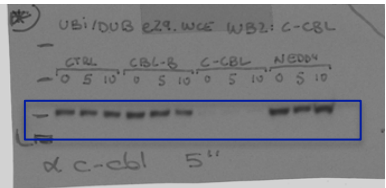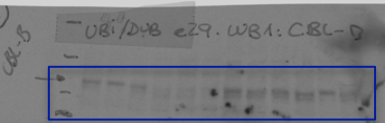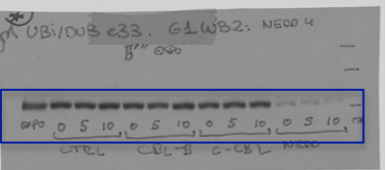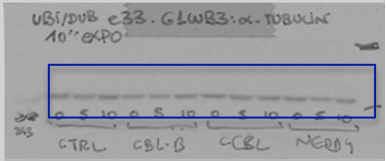

pAKT PTEN CONTROLS

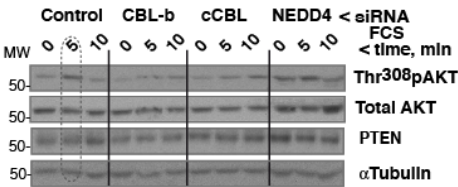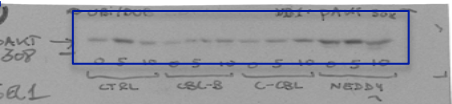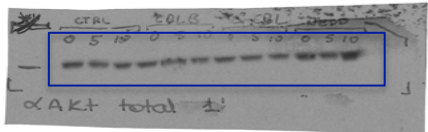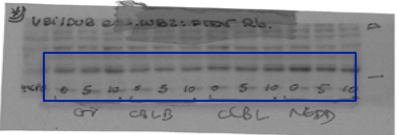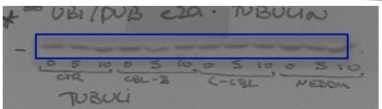

**C**

r-cCBL, E2N

| r-cCBL, E2N   |            |            |          |          | r-PTEN alone |            |          |
|---------------|------------|------------|----------|----------|--------------|------------|----------|
| w/o UBI       | Complete R | w/o r-cCBL | w/o PTEN | w/o UBI  | Complete R   | w/o r-cCBL | w/o PTEN |
| MW            | +          | +          | +        | +        | +            | +          | +        |
| 150           |            |            |          |          |              |            |          |
| 100           |            |            |          |          |              |            |          |
| 75            |            |            |          |          |              |            |          |
| WB: Ubiquitin |            |            |          | WB: PTEN |              |            |          |
| WB: cCBL      |            |            |          |          |              |            |          |

Arrows indicate PTEN ubiquitination products. Molecular weight markers (150, 100, 75 kDa) are indicated on the left. The bottom panel shows Western blots for Ubiquitin and cCBL as loading controls.

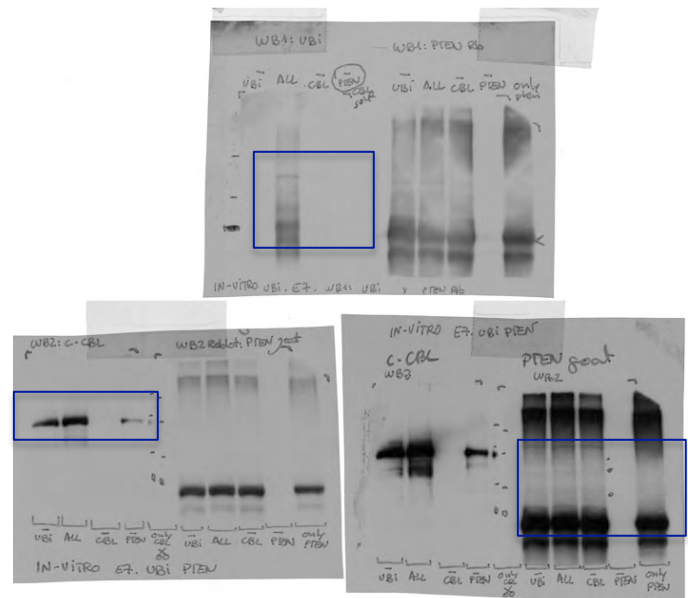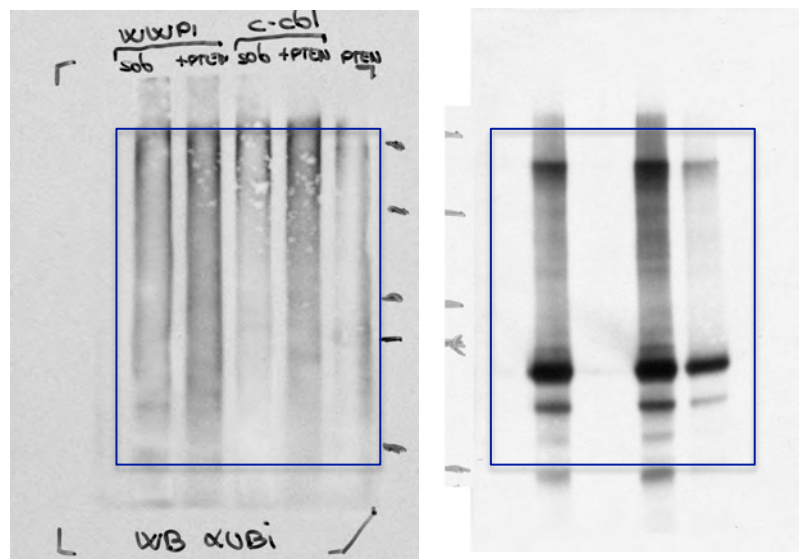

**Fig. 7a LEFT IP EGFR** WB PTEN and EGFR (LT = Total Lysate)

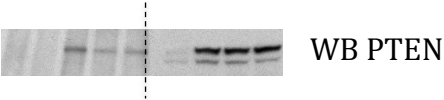

2°WB PTEN (after cCBL)

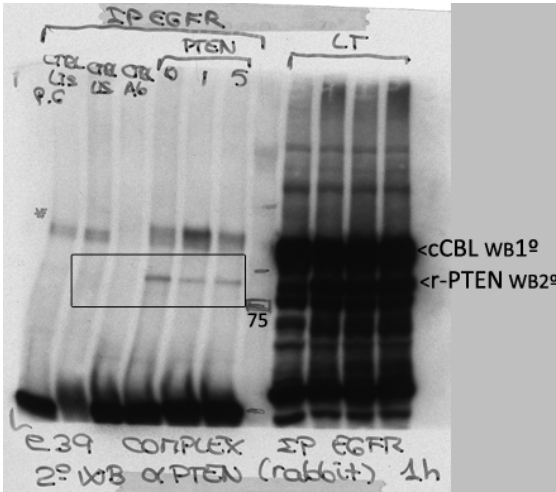

SAME GEL less exposed (for right lanes)

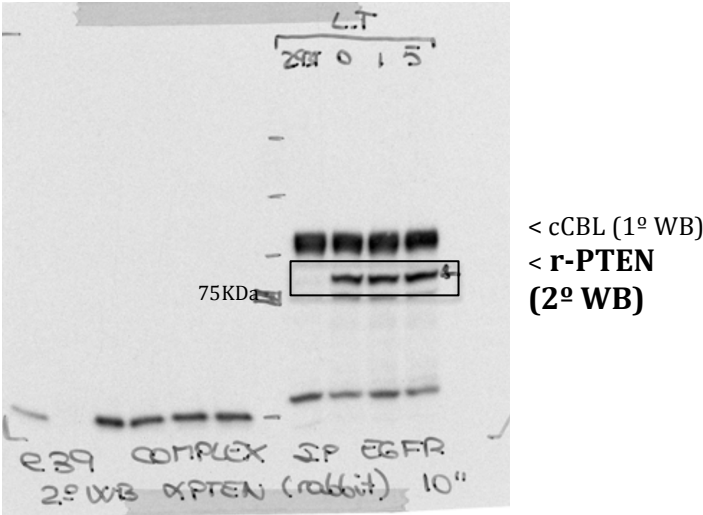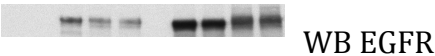

3°WB EGFR

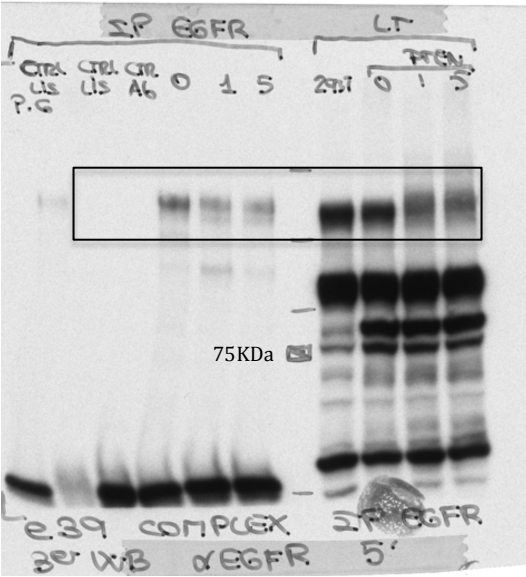

< EGFR 3°WB  
< cCBL (1° WB)  
< r-PTEN(2° WB)

**Fig. 7a CENTRAL** cCBL IP WB EGFR and WB cCBL

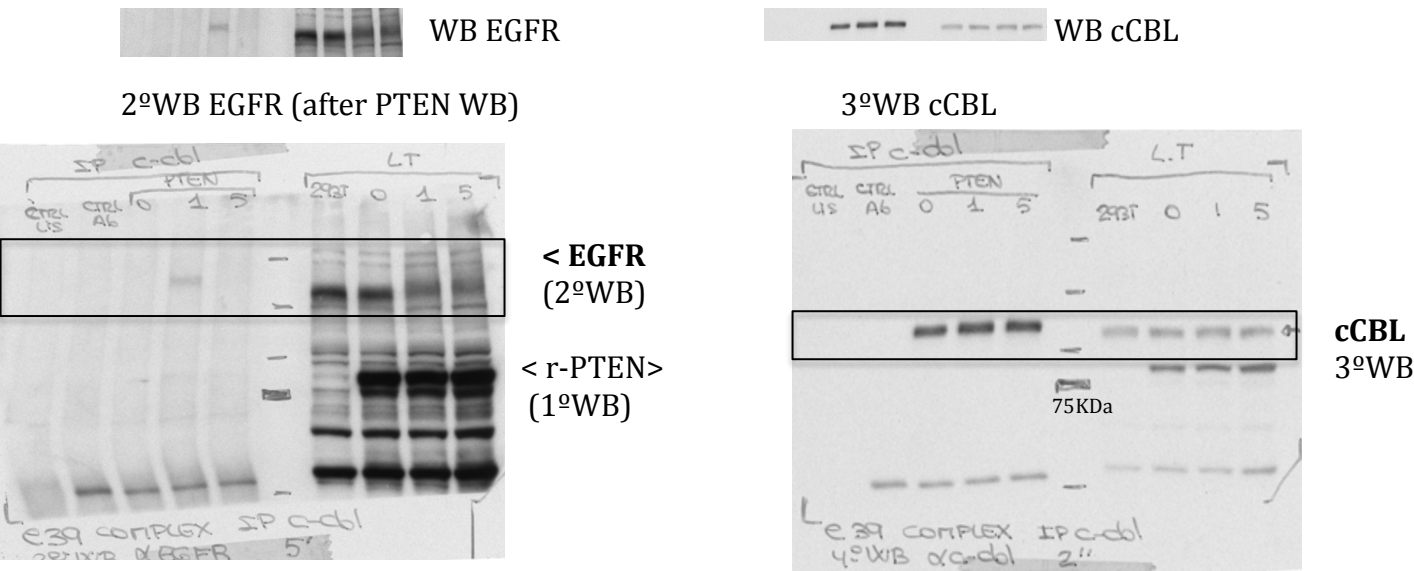

**Fig. 7a RIGHT** cCBL IP WB PTEN and WB cCBL

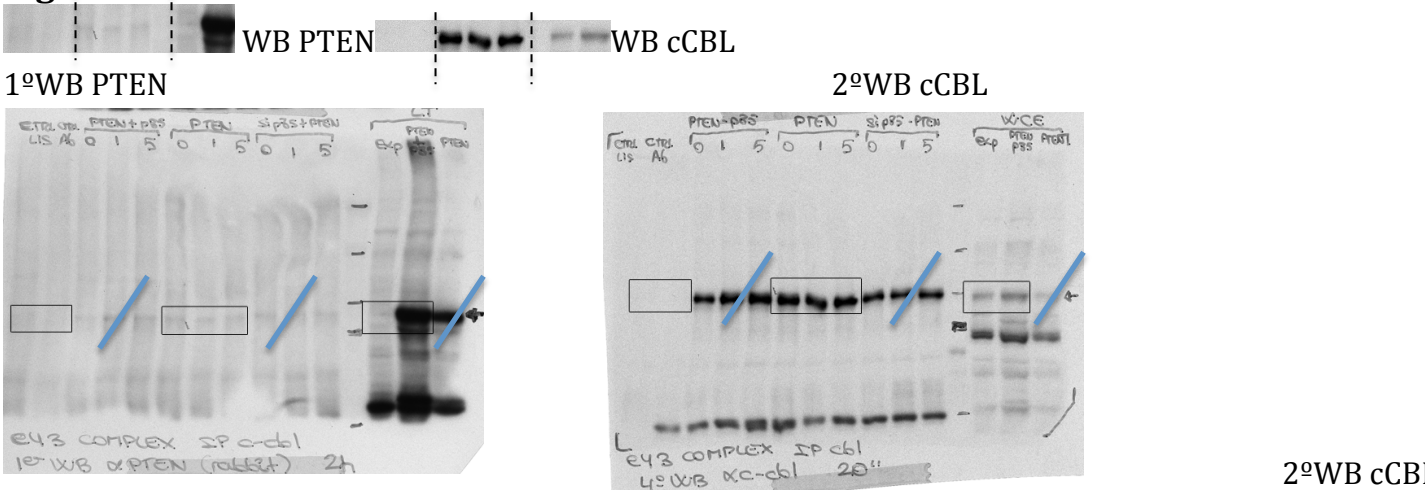

**Fig. 7b** cCBL IP WB EGFR and cCBL

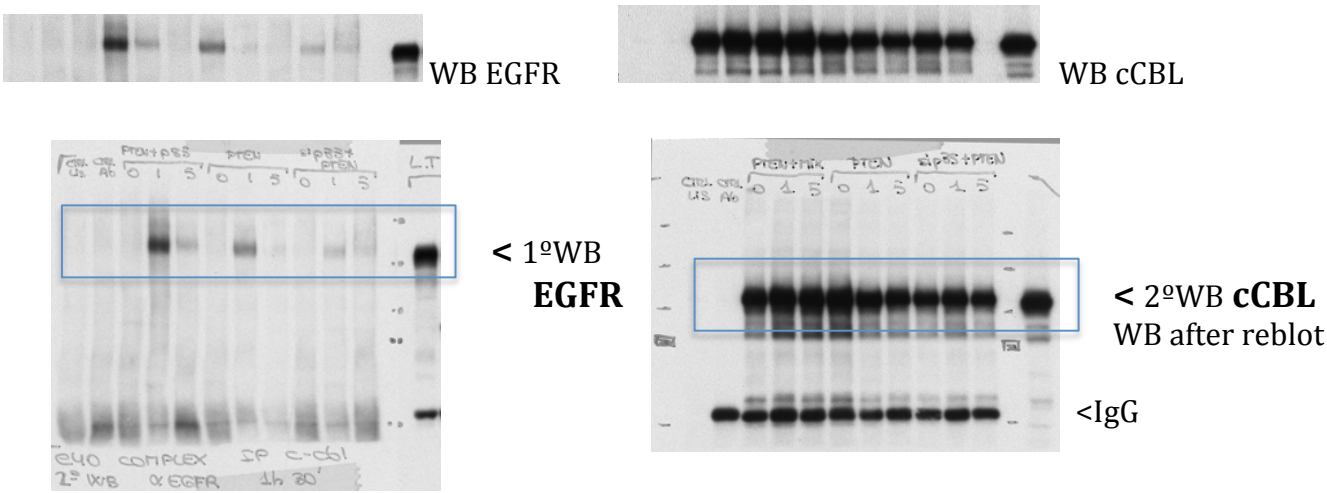

**Fig. 7b** EGFR IP WB cCBL and EGFR

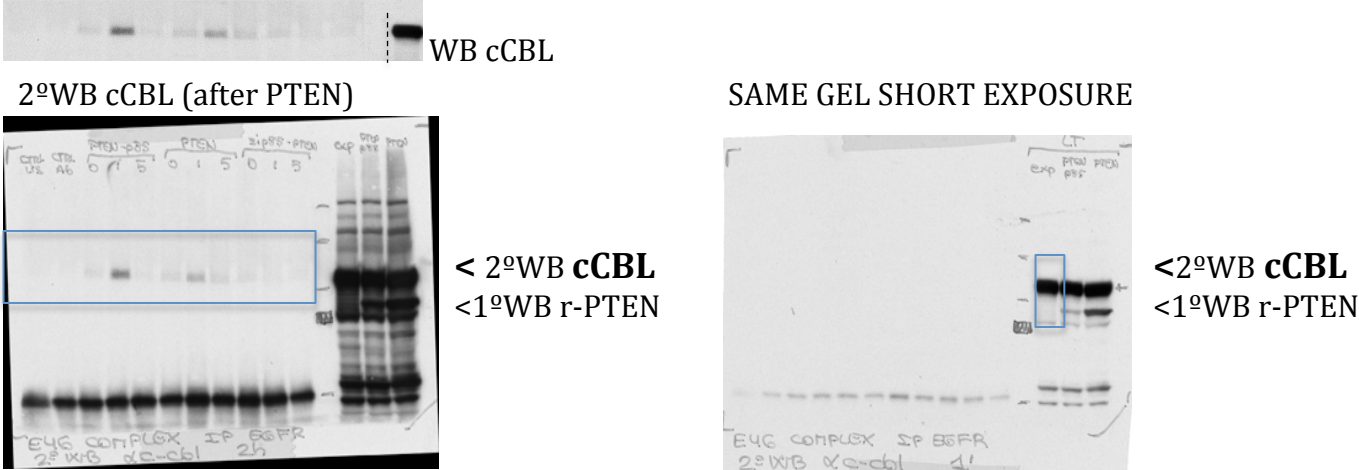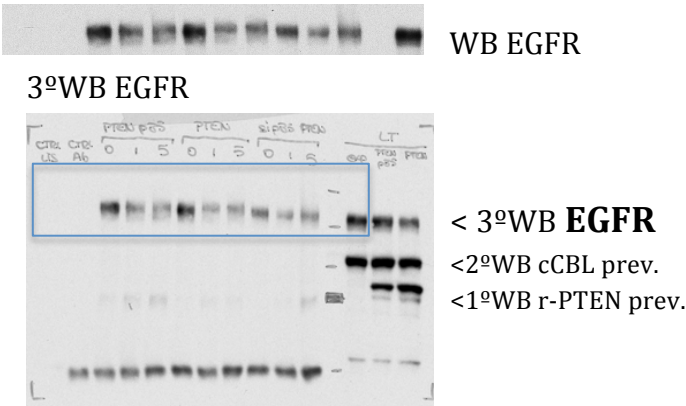



**Figura 7e**

WB cCBL  
WB  $\alpha$  Tubulin

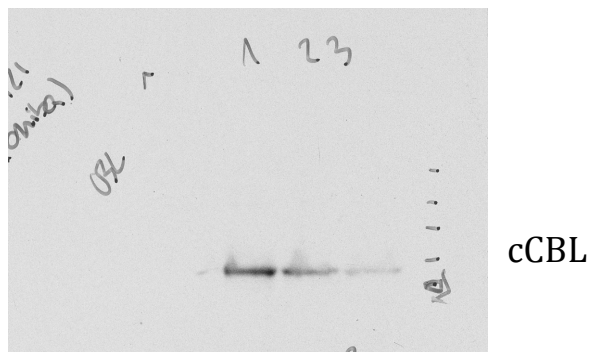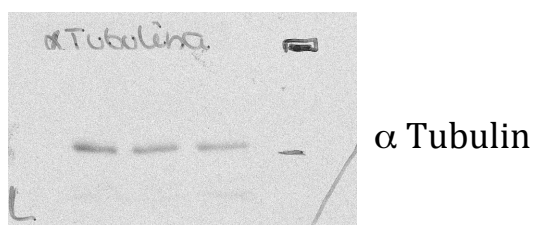

Supplement: s1 [file s1]
